# Supplementary material for: Hallmarks of aging-based dual-purpose disease and age-associated targets predicted using PandaOmics AI-powered discovery engine
Source: publisher site journal article supplement (doi:10.18632/aging.203960), 2022-03-29
Supplement: Supplementary file [file aging-v14i6-203960-supplementary-material-SD3.pdf]

## SUPPLEMENTARY TABLES

Please browse Full Text version to see the data of Supplementary Tables 1, 2, 6 and 7.

### Supplementary Table 1. Top-100 genes for each filter setting.

### Supplementary Table 2. Genes associated with hallmarks of aging.

### Supplementary Table 3. Overlapping of high confidence targets with the pool of curated aging-associated genes from clinical trials.

| Gene <sup>1</sup> | Aging clinical trial <sup>2</sup>                                                                                  | Druggability <sup>3</sup> | Target family <sup>4</sup> | Top-100 target <sup>5</sup> |
|-------------------|--------------------------------------------------------------------------------------------------------------------|---------------------------|----------------------------|-----------------------------|
| ABL1              | DASATINIB (NCT04994561, NCT04946383)                                                                               | 2,0,2,0                   | Tyrosine kinase            | ✓                           |
| AR                | TESTOSTERONE (NCT00182871, NCT00309855, NCT00680797, NCT02203656, NCT02679274, NCT02990533)                        | 2,0,2,0                   | Nuclear receptor           | ✓                           |
| ESR1              | CLIMARA (NCT00220454, NCT02042196)                                                                                 | 2,2,2,0                   | Nuclear receptor           | ✓                           |
| GHR               | GROWTH HORMONE RELEASING HORMONE (GHRH) (NCT01410799)                                                              | 2,2,2,0                   | Immunoglobulin             | ✓                           |
| IGF1              | ORALLY ACTIVE GROWTH HORMONE SECRETAGOGUE (MK-677) (NCT00474279)                                                   | 2,2,2,0                   | Growth factor              | ✓                           |
| IGF1R             | INSULIN-LIKE GROWTH FACTOR 1 (NCT03932162)                                                                         | 2,2,2,0                   | Receptor kinase            | ✓                           |
| KIT               | DASATINIB (NCT04994561, NCT04946383)                                                                               | 2,2,2,0                   | Receptor kinase            | ✓                           |
| MAPK14            | DASATINIB (NCT04994561, NCT04946383)                                                                               | 2,0,1,0                   | CMGC kinase                | ✓                           |
| MTOR              | RAPAMYCIN (NCT02874924, NCT04488601, NCT04742777)                                                                  | 2,0,2,0                   | Protein kinase             | ✓                           |
| NR3C1             | METHYLPREDNISOLONE (NCT03529929)                                                                                   | 2,0,2,0                   | Nuclear receptor           | ✓                           |
| PDGFRB            | DASATINIB (NCT04994561, NCT04946383)                                                                               | 2,2,2,0                   | Receptor kinase            | ✓                           |
| SIRT1             | RESVERATROL (NCT02523274)                                                                                          | 2,0,2,0                   | Acyltransferase            | ✓                           |
| SRC               | DASATINIB (NCT04994561, NCT04946383)                                                                               | 2,2,2,0                   | Tyrosine kinase            | ✓                           |
| VDR               | NT-020 (NCT01963767)                                                                                               | 2,0,2,0                   | Nuclear receptor           | ✓                           |
| ACE               | PERINDOPRIL (NCT03295734)                                                                                          | 2,2,2,0                   | Glycosylase                |                             |
| AGTR1             | CANDESARTAN (NCT00605072)                                                                                          | 2,2,2,0                   | GPCR                       |                             |
| AMY2A             | ACARBOSE (NCT02865499, NCT02953093)                                                                                | 2,0,2,0                   | Glycosylase                |                             |
| BCR               | DASATINIB (NCT04994561, NCT04946383)                                                                               | 2,2,1,0                   | Protein kinase             |                             |
| BST1              | NICOTINAMIDE MONONUCLEOTIDE (NCT04823260)                                                                          | 2,2,2,0                   | Glycosylase                |                             |
| BTK               | DASATINIB (NCT04994561, NCT04946383)                                                                               | 2,2,2,0                   | Tyrosine kinase            |                             |
| CHRNA3            | NICOTINE PATCH, ORAL MECAMYLAMINE, PLACEBO (NCT03408574)                                                           | 2,0,1,0                   | Ion channel                |                             |
| CHRNA4            | NICOTINE PATCH, ORAL MECAMYLAMINE, PLACEBO (NCT03408574)                                                           | 2,0,2,0                   | Ion channel                |                             |
| CSK               | DASATINIB (NCT04994561, NCT04946383)                                                                               | 2,0,2,0                   | Tyrosine kinase            |                             |
| EPHA2             | DASATINIB (NCT04994561, NCT04946383)                                                                               | 2,2,2,0                   | Receptor kinase            |                             |
| EPHA5             | DASATINIB (NCT04994561, NCT04946383)                                                                               | 2,2,1,0                   | Receptor kinase            |                             |
| EPHB4             | DASATINIB (NCT04994561, NCT04946383)                                                                               | 2,2,2,0                   | Receptor kinase            |                             |
| ETFDH             | METFORMIN (NCT01765946, NCT02308228, NCT02432287, NCT03072485, NCT03309007, NCT03451006, NCT03713801, NCT04264897) | 2,0,1,0                   | Oxidoreductase             |                             |
| FGR               | DASATINIB (NCT04994561, NCT04946383)                                                                               | 2,1,2,2                   | Tyrosine kinase            |                             |
| FKBP1A            | RAPAMYCIN (NCT02874924, NCT04488601, NCT04742777)                                                                  | 2,0,2,0                   | Isomerase                  |                             |
| FRK               | DASATINIB (NCT04994561, NCT04946383)                                                                               | 2,0,1,2                   | Tyrosine kinase            |                             |

|                     |                                                                                                                    |         |                     |
|---------------------|--------------------------------------------------------------------------------------------------------------------|---------|---------------------|
| FYN                 | DASATINIB (NCT04994561, NCT04946383)                                                                               | 2,2,2,0 | Tyrosine kinase     |
| GAA                 | ACARBOSE (NCT02865499, NCT02953093)                                                                                | 2,0,2,0 | Glycosylase         |
| GABRA1              | ZOLPIDEM (NCT00383357, NCT03657212)                                                                                | 2,0,2,0 | Ion channel         |
| GABRA2              | ZOLPIDEM (NCT00383357, NCT03657212)                                                                                | 2,0,2,0 | Ion channel         |
| GABRA3              | ZOLPIDEM (NCT00383357, NCT03657212)                                                                                | 2,0,2,1 | Ion channel         |
| GABRB1              | ZOLPIDEM (NCT00383357, NCT03657212)                                                                                | 2,0,1,1 | Ion channel         |
| GABRG2              | ZOLPIDEM (NCT00383357, NCT03657212)                                                                                | 2,0,2,0 | Ion channel         |
| GHSR                | ORALLY ACTIVE GROWTH HORMONE SECRETAGOGUE (MK-677) (NCT00474279)                                                   | 2,0,2,0 | GPCR                |
| GPD1                | METFORMIN (NCT01765946, NCT02308228, NCT02432287, NCT03072485, NCT03309007, NCT03451006, NCT03713801, NCT04264897) | 1,0,1,0 | Oxidoreductase      |
| GPD2                | METFORMIN (NCT01765946, NCT02308228, NCT02432287, NCT03072485, NCT03309007, NCT03451006, NCT03713801, NCT04264897) | 2,0,1,0 | Oxidoreductase      |
| LCK                 | DASATINIB (NCT04994561, NCT04946383)                                                                               | 2,2,2,0 | Tyrosine kinase     |
| MGAM                | ACARBOSE (NCT02865499, NCT02953093)                                                                                | 2,0,2,0 | Glycosylase         |
| NR3C2               | TESTOSTERONE (NCT00182871)                                                                                         | 2,0,2,0 | Nuclear receptor    |
| NR4A3               | DASATINIB (NCT04994561, NCT04946383)                                                                               | 1,0,1,0 | Nuclear receptor    |
| OXTR                | OXYTOCIN NASAL SPRAY (NCT03119610)                                                                                 | 2,2,2,0 | GPCR                |
| PPAT                | DASATINIB (NCT04994561, NCT04946383)                                                                               | 2,0,2,0 | Glycosyltransferase |
| PTGS1               | DICLOFENAC (NCT03072485)                                                                                           | 2,0,2,0 | Oxidoreductase      |
| PTGS2               | DICLOFENAC (NCT03072485)                                                                                           | 2,2,2,0 | Oxidoreductase      |
| SI                  | ACARBOSE (NCT02865499, NCT02953093)                                                                                | 2,0,1,0 | Glycosylase         |
| SRD5A1              | DUTASTERIDE (NCT00309855)                                                                                          | 2,0,2,0 | Oxidoreductase      |
| SRD5A2              | DUTASTERIDE (NCT00309855)                                                                                          | 2,0,1,0 | Oxidoreductase      |
| SRMS                | DASATINIB (NCT04994561, NCT04946383)                                                                               | 2,0,1,0 | Tyrosine kinase     |
| TERT                | AAV-HTERT (NCT04133649)                                                                                            | 2,2,2,0 | Transferase         |
| YES1                | DASATINIB (NCT04994561, NCT04946383)                                                                               | 2,2,2,0 | Tyrosine kinase     |
| ABL2                | DASATINIB (NCT04994561, NCT04946383)                                                                               | 1,0,1,1 | Tyrosine kinase     |
| CHRN2               | NICOTINE PATCH, ORAL MECAMYLAMINE, PLACEBO (NCT03408574)                                                           | 2,0,2,1 | Ion channel         |
| CHRN4               | NICOTINE PATCH, ORAL MECAMYLAMINE, PLACEBO (NCT03408574)                                                           | 2,0,2,1 | Ion channel         |
| SRD5A3              | DUTASTERIDE (NCT00309855)                                                                                          | 2,2,1,1 | Oxidoreductase      |
| BLK*                | DASATINIB (NCT04994561, NCT04946383)                                                                               | 2,0,2,1 | Tyrosine kinase     |
| HCK*                | DASATINIB (NCT04994561, NCT04946383)                                                                               | 2,2,2,1 | Tyrosine kinase     |
| LYN*                | DASATINIB (NCT04994561, NCT04946383)                                                                               | 2,2,2,1 | Tyrosine kinase     |
| PRKAB1 <sup>^</sup> | METFORMIN (NCT01765946, NCT02308228, NCT02432287, NCT03072485, NCT03309007, NCT03451006, NCT03713801, NCT04264897) | 2,0,1,2 | Protein kinase      |

<sup>1</sup>Curated pool of aging-associated genes (genes identified as medium novel targets were marked with asterisks, and highly novel targets with arrow heads) Sources of curation was <http://ClinicalTrials.gov> aging drug targets. <sup>2</sup>Example of drug investigated in aging clinical trials with clinical trial ID shown in parenthesis. Target-drug association were manually curated. <sup>3</sup>Druggability scores defined in PandaOmics (small molecules, antibodies, safety, novelty). <sup>4</sup>Druggable gene classes defined in PandaOmics. <sup>5</sup>Genes identified as top-100 high-confidence targets are marked with ticks.

**Supplementary Table 4. Overlapping of high confidence targets with the pool of curated aging-associated genes from publication.**

| Genes <sup>1</sup> | Gene Name <sup>2</sup>                                                               | Druggability <sup>3</sup> | Target family <sup>4</sup> | Top-100 target <sup>5</sup> |
|--------------------|--------------------------------------------------------------------------------------|---------------------------|----------------------------|-----------------------------|
| AKT1               | AKT serine/threonine kinase 1                                                        | 2,0,2,0                   | AGC kinase                 | ✓                           |
| CASP3              | caspase 3                                                                            | 2,0,2,0                   | Peptidase                  | ✓                           |
| CAT                | catalase                                                                             | 2,0,2,0                   | Oxidoreductase             | ✓                           |
| CHUK               | component of inhibitor of nuclear factor kappa B kinase complex                      | 2,0,2,0                   | Protein kinase             | ✓                           |
| DNMT1              | DNA methyltransferase 1                                                              | 2,0,1,0                   | Methyltransferase          | ✓                           |
| EGFR               | epidermal growth factor receptor                                                     | 2,2,2,0                   | Receptor kinase            | ✓                           |
| HDAC9              | histone deacetylase 9                                                                | 2,0,1,0                   | Hydrolase                  | ✓                           |
| IGF1               | insulin like growth factor 1                                                         | 2,2,2,0                   | Growth factor              | ✓                           |
| IGF1R              | insulin like growth factor 1 receptor                                                | 2,2,2,0                   | Receptor kinase            | ✓                           |
| IL1B               | interleukin 1 beta                                                                   | 2,2,2,0                   | Interleukin                | ✓                           |
| IL6                | interleukin 6                                                                        | 2,2,2,0                   | Interleukin                | ✓                           |
| JAK2               | Janus kinase 2                                                                       | 2,0,2,0                   | Tyrosine kinase            | ✓                           |
| MAPK8              | mitogen-activated protein kinase 8                                                   | 2,0,2,0                   | CMGC kinase                | ✓                           |
| MMP1               | matrix metalloproteinase 1                                                           | 2,2,2,0                   | Peptidase                  | ✓                           |
| MMP2               | matrix metalloproteinase 2                                                           | 2,2,2,0                   | Peptidase                  | ✓                           |
| MMP9               | matrix metalloproteinase 9                                                           | 2,2,2,0                   | Peptidase                  | ✓                           |
| MTOR               | mechanistic target of rapamycin kinase                                               | 2,0,2,0                   | Protein kinase             | ✓                           |
| PPARA              | peroxisome proliferator activated receptor alpha                                     | 2,0,2,0                   | Nuclear receptor           | ✓                           |
| PTEN               | phosphatase and tensin homolog                                                       | 1,1,1,0                   | Esterase                   | ✓                           |
| SIRT1              | sirtuin 1                                                                            | 2,0,2,0                   | Acyltransferase            | ✓                           |
| SOD2               | superoxide dismutase 2                                                               | 1,0,1,0                   | Oxidoreductase             | ✓                           |
| TGFB1              | transforming growth factor beta 1                                                    | 2,2,2,0                   | Growth factor              | ✓                           |
| TGFB2              | transforming growth factor beta receptor 2                                           | 2,2,2,0                   | Receptor kinase            | ✓                           |
| TNF                | tumor necrosis factor                                                                | 2,2,2,0                   | Tumor necrosis factor      | ✓                           |
| ABO                | ABO, alpha 1-3-N-acetylgalactosaminyltransferase and alpha 1-3-galactosyltransferase | 1,0,1,0                   | Glycosyltransferase        |                             |
| AKT2               | AKT serine/threonine kinase 2                                                        | 2,0,2,0                   | AGC kinase                 |                             |
| BMP1               | bone morphogenetic protein 1                                                         | 1,0,1,0                   | Peptidase                  |                             |
| GZMB               | granzyme B                                                                           | 2,0,2,0                   | Peptidase                  |                             |
| HAS1               | hyaluronan synthase 1                                                                | 1,2,1,0                   | Glycosyltransferase        |                             |
| HAS2               | hyaluronan synthase 2                                                                | 1,0,1,0                   | Glycosyltransferase        |                             |
| HDAC11             | histone deacetylase 11                                                               | 2,2,2,0                   | Hydrolase                  |                             |
| HDAC4              | histone deacetylase 4                                                                | 2,0,2,0                   | Hydrolase                  |                             |
| IL15               | interleukin 15                                                                       | 2,2,2,0                   | Interleukin                |                             |
| MME                | membrane metalloendopeptidase                                                        | 2,2,2,0                   | Peptidase                  |                             |
| MMP13              | matrix metalloproteinase 13                                                          | 2,2,2,0                   | Peptidase                  |                             |
| MT-ND2             | mitochondrially encoded NADH:ubiquinone oxidoreductase core subunit 2                | 2,0,1,0                   | Translocase                |                             |
| NOX4               | NADPH oxidase 4                                                                      | 2,0,2,0                   | Oxidoreductase             |                             |
| PPIA               | peptidylprolyl isomerase A                                                           | 2,0,2,0                   | Isomerase                  |                             |
| PRDX2              | peroxiredoxin 2                                                                      | 1,0,1,0                   | Oxidoreductase             |                             |
| PRKCD              | protein kinase C delta                                                               | 2,0,2,0                   | AGC kinase                 |                             |

|                    |                                       |         |                 |
|--------------------|---------------------------------------|---------|-----------------|
| PTGS2              | prostaglandin-endoperoxide synthase 2 | 2,2,2,0 | Oxidoreductase  |
| SIRT6              | sirtuin 6                             | 2,0,1,0 | Acyltransferase |
| SOD1               | superoxide dismutase 1                | 2,2,2,0 | Oxidoreductase  |
| TYR                | tyrosinase                            | 2,0,2,0 | Oxidoreductase  |
| WNK2               | WNK lysine deficient protein kinase 2 | 1,0,1,0 | Protein kinase  |
| XDH                | xanthine dehydrogenase                | 2,0,2,0 | Oxidoreductase  |
| AOPEP              | aminopeptidase O (putative)           | 2,0,1,2 | Peptidase       |
| CLOCK <sup>^</sup> | clock circadian regulator             | 1,0,1,2 | Acyltransferase |

<sup>1</sup>Curated pool of aging-associated genes (genes identified as medium novel targets are marked with asterisks, and highly novel targets with arrow heads). <sup>2</sup>These genes were associated with aging or skin aging with reference to a publicity database. <sup>3</sup>Druggability scores defined in PandaOmics (small molecules, antibodies, safety, novelty). <sup>4</sup>Druggable gene classes defined in PandaOmics. <sup>5</sup>Genes identified as top-100 high confidence targets were marked with ticks.

### Supplementary Table 5. Overlapping of high confidence targets with the pool of curated aging-associated genes from geroprotectors.

| Genes <sup>1</sup> | Geroprotectors <sup>2</sup>  | Druggability <sup>3</sup> | Target family <sup>4</sup> | Top-100 target <sup>5</sup> |
|--------------------|------------------------------|---------------------------|----------------------------|-----------------------------|
| CASP1              | Aspirin                      | 2,0,2,0                   | Peptidase                  | ✓                           |
| CASP3              | Aspirin                      | 2,0,2,0                   | Peptidase                  | ✓                           |
| CHUK               | N-acetyl-L-cysteine          | 2,0,2,0                   | Protein kinase             | ✓                           |
| ESR1               | 17-A-Estradiol; Melatonin    | 2,2,2,0                   | Nuclear receptor           | ✓                           |
| HSPA5              | Aspirin                      | 2,2,2,0                   | Hydrolase                  | ✓                           |
| IKBKB              | Aspirin; N-acetyl-L-cysteine | 2,0,2,0                   | Protein kinase             | ✓                           |
| MTOR               | Rapamycin                    | 2,0,2,0                   | Protein kinase             | ✓                           |
| ACE                | Enalapril                    | 2,2,2,0                   | Glycosylase                |                             |
| ACY1               | N-acetyl-L-cysteine          | 2,0,2,0                   | Hydrolase                  |                             |
| ADRB1              | Metoprolol; Nebivolol        | 2,2,2,0                   | GPCR                       |                             |
| ADRB2              | Metoprolol; Nebivolol        | 2,0,2,0                   | GPCR                       |                             |
| ADRB3              | Nebivolol                    | 2,2,2,0                   | GPCR                       |                             |
| AKR1C1             | Aspirin                      | 1,0,1,0                   | Oxidoreductase             |                             |
| ALOX5              | Nordihydroguaiaretic Acid    | 2,0,2,0                   | Oxidoreductase             |                             |
| AMY2A              | Acarbose                     | 2,0,2,0                   | Glycosylase                |                             |
| ASMT               | Melatonin                    | 1,0,1,0                   | Methyltransferase          |                             |
| CHRNA4             | 17-A-Estradiol               | 2,0,2,0                   | Ion channel                |                             |
| CKB                | Creatine                     | 2,0,1,0                   | Unclassified kinase        |                             |
| CKM                | Creatine                     | 2,0,1,0                   | Non-protein kinase         |                             |
| EDNRA              | Aspirin                      | 2,2,2,0                   | GPCR                       |                             |
| EPX                | Melatonin                    | 1,0,1,0                   | Oxidoreductase             |                             |
| ESR2               | 17-A-Estradiol               | 2,0,2,0                   | Nuclear receptor           |                             |
| ETFDH              | Metformin                    | 2,0,1,0                   | Oxidoreductase             |                             |
| GAA                | Acarbose                     | 2,0,2,0                   | Glycosylase                |                             |
| GAMT               | Creatine                     | 2,0,1,0                   | Methyltransferase          |                             |
| GPD1               | Metformin                    | 1,0,1,0                   | Oxidoreductase             |                             |
| GPER1              | 17-A-Estradiol               | 1,0,1,0                   | GPCR                       |                             |
| GRIN1              | N-acetyl-L-cysteine          | 2,0,1,0                   | Ion channel                |                             |
| GRIN2A             | N-acetyl-L-cysteine          | 2,0,1,0                   | Ion channel                |                             |
| GRIN2B             | N-acetyl-L-cysteine          | 2,0,2,0                   | Ion channel                |                             |

|                     |                        |         |                     |
|---------------------|------------------------|---------|---------------------|
| GRIN2D              | N-acetyl-L-cysteine    | 2,0,1,0 | Ion channel         |
| GRIN3A              | N-acetyl-L-cysteine    | 2,0,1,0 | Ion channel         |
| GSS                 | N-acetyl-L-cysteine    | 2,0,1,0 | Ligase              |
| IFNG                | D-Glucosamine          | 2,2,2,0 | Interferon          |
| MAOA                | Deprenyl or Selegiline | 2,0,2,0 | Oxidoreductase      |
| MAOB                | Deprenyl or Selegiline | 2,0,2,0 | Oxidoreductase      |
| MGAM                | Acarbose               | 2,0,2,0 | Glycosylase         |
| MPO                 | Melatonin              | 2,0,2,0 | Oxidoreductase      |
| MTNR1A              | Melatonin              | 2,0,2,0 | GPCR                |
| MTNR1B              | Melatonin              | 2,0,2,0 | GPCR                |
| NEU1                | Aspirin                | 1,0,1,0 | Glycosylase         |
| NPY2R               | Cysteamine             | 2,0,2,0 | GPCR                |
| NQO2                | Melatonin              | 2,0,2,0 | Oxidoreductase      |
| NR1I2               | 17-A-Estradiol         | 2,0,2,0 | Nuclear receptor    |
| PTGS1               | Aspirin                | 2,0,2,0 | Oxidoreductase      |
| PTGS2               | Aspirin                | 2,2,2,0 | Oxidoreductase      |
| RPS6KA3             | Aspirin                | 2,0,2,0 | AGC kinase          |
| SI                  | Acarbose               | 2,0,1,0 | Glycosylase         |
| CKMT1A              | Creatine               | 2,0,1,1 | Unclassified kinase |
| CKMT2               | Creatine               | 2,0,1,1 | Unclassified kinase |
| RORB                | Melatonin              | 2,0,2,1 | Nuclear receptor    |
| PRKAB1 <sup>^</sup> | Metformin              | 2,0,1,2 | Protein kinase      |

<sup>1</sup>Curated pool of geroprotector-associated genes (genes identified as medium novel targets are marked with asterisks, and highly novel targets with arrow heads). <sup>2</sup>These geroprotectors were (1) approved drugs for human use and (2) investigated for antiaging effects using human or animal models (with reference to <http://geroprotectors.org>). Target-drug association were manually curated. <sup>3</sup>Druggability scores defined in PandaOmics (small molecules, antibodies, safety, novelty). <sup>4</sup>Druggable gene classes defined in PandaOmics. <sup>5</sup>Genes identified as top-100 high confidence targets were marked with ticks.

#### Supplementary Table 6. Pathway enrichment analysis based on 145 targets associated with the hallmarks of aging.

#### Supplementary Table 7. List of AAD and NAAD datasets analyzed.

#### Supplementary Table 8. The identification of target-target interactions.

| Targets interactions <sup>1</sup> | Reference (PMID) |
|-----------------------------------|------------------|
| ROCK1-c-Myc                       | 30613282         |
| FOXO-SIRT3                        | 27686535         |
| mTOR-STAT3                        | 26697523         |
| mTOR-TFEB                         | 30120233         |
| mTOR-PPARG                        | 27901044         |
| MAPK14-c-Myc                      | 10623602         |
| MAPK8-c-Myc                       | 10623602         |
| MAPK-CREB                         | 30214393         |
| MAPK-NRF2                         | 31221142         |
| KDM7A-Catenin beta-1              | 30614617         |
| KDM7A-Catenin beta-1              | 32214833         |

<sup>1</sup>Targets interactions were identified outside the context of pathways with KEGG pathway database.
