# Supplementary material for: Hallmarks of aging-based dual-purpose disease and age-associated targets predicted using PandaOmics AI-powered discovery engine
Source: Aging (Albany NY). 2022 Mar 29;14(6):2475–506. doi: 10.18632/aging.203960 (PMC9004567; doi:10.18632/aging.203960)
Supplement: Supplementary Tables 1-2 and 6-7 [file aging-14-203960-s002.xlsx]

## Sheet: Supplementary Table 1
Supplementary Table 1. Top-100 genes for each filter setting.
Filter setting	Gene category[1]	Gene	Occurrence percentage[2]	Average rank[3]	Rank[4]
High confidence	Common target	CASP3	100	23.4286	1
High confidence	Common target	VEGFA	100	25.7857	2
High confidence	Common target	MMP9	100	29.2857	3
High confidence	Common target	TLR4	92.8571	16.4615	4
High confidence	Common target	EGFR	92.8571	20.7692	5
High confidence	Common target	TGFB1	92.8571	22.6154	6
High confidence	Common target	AKT1	92.8571	25.7692	7
High confidence	Common target	MAPK3	92.8571	27.6923	8
High confidence	Common target	TNF	92.8571	50.1538	9
High confidence	Common target	HSPA5	85.7143	22.9167	10
High confidence	Common target	SPP1	85.7143	27.9167	11
High confidence	Common target	SIRT1	85.7143	39.9167	12
High confidence	Common target	CXCR4	78.5714	20.3636	13
High confidence	Common target	MAPK8	78.5714	31.0909	14
High confidence	Common target	JAK2	78.5714	39.6364	15
High confidence	Common target	CTSB	78.5714	43.6364	16
High confidence	Common target	PTPRC	78.5714	45.7273	17
High confidence	Common target	MTOR	78.5714	48.8182	18
High confidence	Common target	CCL2	78.5714	56.2727	19
High confidence	Age-associated target	KDR	71.4286	28.1	20
High confidence	Common target	CXCL8	71.4286	39	21
High confidence	Common target	AR	71.4286	42.7	22
High confidence	Common target	TLR2	71.4286	44.6	23
High confidence	Common target	ITGB2	71.4286	60.3	24
High confidence	Age-associated target	PTEN	71.4286	66.7	25
High confidence	Common target	CYBB	64.2857	27.2222	26
High confidence	Common target	NR3C1	64.2857	32.1111	27
High confidence	Common target	CASP1	64.2857	32.7778	28
High confidence	Common target	TNFRSF1A	64.2857	33.1111	29
High confidence	Common target	IGF1	64.2857	40.5556	30
High confidence	Common target	ESR1	64.2857	41.2222	31
High confidence	Common target	MMP2	64.2857	42.2222	32
High confidence	Common target	PPARG	64.2857	42.8889	33
High confidence	Common target	IL6	64.2857	45.5556	34
High confidence	Common target	GSK3B	64.2857	46.8889	35
High confidence	Common target	PPARA	64.2857	47.1111	36
High confidence	Common target	CCR5	64.2857	56.1111	37
High confidence	Age-associated target	PDGFRB	57.1429	26	38
High confidence	Common target	CD36	57.1429	45.375	39
High confidence	Common target	CASP8	57.1429	45.5	40
High confidence	Common target	IL1B	57.1429	45.625	41
High confidence	Common target	MIF	57.1429	55.75	42
High confidence	Common target	ITGAM	57.1429	58.875	43
High confidence	Common target	MAPK1	50	36.1429	44
High confidence	Age-associated target	SRC	50	36.7143	45
High confidence	Age-associated target	TRAF6	50	39.4286	46
High confidence	Age-associated target	SELP	50	44.7143	47
High confidence	Common target	TNFRSF1B	50	46.7143	48
High confidence	Common target	CAT	50	49.5714	49
High confidence	Age-associated target	IKBKB	50	51	50
High confidence	Common target	FGF2	50	52	51
High confidence	Common target	CXCL10	50	54	52
High confidence	Common target	HDAC1	50	56.1429	53
High confidence	Common target	HGF	50	59	54
High confidence	Age-associated target	NGF	50	60.2857	55
High confidence	Common target	DNMT1	50	61	56
High confidence	Age-associated target	CXCL12	50	61.2857	57
High confidence	Age-associated target	ADAM17	50	66.2857	58
High confidence	Common target	MAPK14	42.8571	14.5	59
High confidence	Age-associated target	RAC1	42.8571	36	60
High confidence	Age-associated target	NOTCH1	42.8571	36.5	61
High confidence	Age-associated target	INSR	42.8571	37.5	62
High confidence	Age-associated target	ITGAV	42.8571	40.1667	63
High confidence	Age-associated target	PTK2	42.8571	43.6667	64
High confidence	Age-associated target	EP300	42.8571	43.8333	65
High confidence	Age-associated target	HDAC9	42.8571	48.8333	66
High confidence	Common target	CCR2	42.8571	54.1667	67
High confidence	Age-associated target	NOS3	42.8571	58.6667	68
High confidence	Age-associated target	DUSP1	42.8571	61.1667	69
High confidence	Age-associated target	EZH2	42.8571	62.3333	70
High confidence	Common target	HP	42.8571	63	71
High confidence	Age-associated target	GHR	42.8571	66.1667	72
High confidence	Age-associated target	IGF1R	42.8571	68.1667	73
High confidence	Common target	VDR	42.8571	70.1667	74
High confidence	Common target	IL18	42.8571	72.8333	75
High confidence	Age-associated target	RHOA	35.7143	29.8	76
High confidence	Common target	JAK1	35.7143	31.2	77
High confidence	Common target	MMP1	35.7143	40	78
High confidence	Age-associated target	TGFBR2	35.7143	44.6	79
High confidence	Age-associated target	NGFR	35.7143	49.8	80
High confidence	Age-associated target	SOD2	35.7143	51	81
High confidence	Age-associated target	PDGFRA	35.7143	51	82
High confidence	Age-associated target	ABL1	35.7143	51.2	83
High confidence	Age-associated target	EGLN1	35.7143	55.4	84
High confidence	Age-associated target	CYBA	35.7143	56	85
High confidence	Age-associated target	ROCK1	35.7143	59.2	86
High confidence	Age-associated target	CTSS	35.7143	60.4	87
High confidence	Age-associated target	IGF2	35.7143	61.4	88
High confidence	Age-associated target	BMP2	35.7143	61.4	89
High confidence	Age-associated target	MAP2K1	35.7143	62	90
High confidence	Age-associated target	PLAU	35.7143	63.4	91
High confidence	Common target	CD40	35.7143	69.4	92
High confidence	Common target	PARP1	35.7143	74.8	93
High confidence	Age-associated target	MMP7	28.5714	4	94
High confidence	Age-associated target	FASN	28.5714	28.75	95
High confidence	Age-associated target	TBK1	28.5714	33.5	96
High confidence	Age-associated target	LOX	28.5714	34.5	97
High confidence	Age-associated target	CHUK	28.5714	35.25	98
High confidence	Common target	KIT	28.5714	38.5	99
High confidence	Age-associated target	HDAC6	28.5714	39.75	100
Medium novelty	Common target	LYN	100	30.8571	1
Medium novelty	Common target	PSMC3	92.8571	41.9231	2
Medium novelty	Common target	HCK	85.7143	13.75	3
Medium novelty	Common target	ITGB5	85.7143	25.25	4
Medium novelty	Common target	PPP1CB	85.7143	34.6667	5
Medium novelty	Common target	UBE2L6	85.7143	41.25	6
Medium novelty	Common target	PSMD14	85.7143	46.9167	7
Medium novelty	Age-associated target	ITGA7	71.4286	41.2	8
Medium novelty	Common target	PRKACB	71.4286	43.4	9
Medium novelty	Age-associated target	PPM1A	71.4286	44.2	10
Medium novelty	Age-associated target	MYO1C	71.4286	48.9	11
Medium novelty	Common target	GNB1	71.4286	57.2	12
Medium novelty	Common target	POLA1	64.2857	39.7778	13
Medium novelty	Common target	ADRA2C	64.2857	40.6667	14
Medium novelty	Common target	UBE2E1	64.2857	41.3333	15
Medium novelty	Common target	ITGB7	64.2857	41.6667	16
Medium novelty	Common target	PDIA6	64.2857	42.1111	17
Medium novelty	Common target	PSMA1	64.2857	43.1111	18
Medium novelty	Common target	UBE2M	64.2857	48.5556	19
Medium novelty	Common target	WWP1	64.2857	49.7778	20
Medium novelty	Common target	DDX21	64.2857	53.7778	21
Medium novelty	Common target	MAPKAPK3	64.2857	54.6667	22
Medium novelty	Common target	RHOT1	64.2857	60.2222	23
Medium novelty	Common target	ITK	57.1429	25	24
Medium novelty	Common target	RHOU	57.1429	27.875	25
Medium novelty	Common target	HDAC10	57.1429	37.5	26
Medium novelty	Common target	HERC5	57.1429	38.125	27
Medium novelty	Common target	IMPDH2	57.1429	44.25	28
Medium novelty	Common target	CSF2RB	57.1429	51.5	29
Medium novelty	Common target	RAB31	57.1429	59.125	30
Medium novelty	Age-associated target	KAT8	57.1429	65.375	31
Medium novelty	Common target	IMPDH1	50	25	32
Medium novelty	Common target	ADRA2B	50	27.2857	33
Medium novelty	Common target	DUSP10	50	27.2857	34
Medium novelty	Common target	PPP3CB	50	31	35
Medium novelty	Common target	DNM3	50	31.7143	36
Medium novelty	Common target	LPIN2	50	31.7143	37
Medium novelty	Common target	PKN2	50	33.4286	38
Medium novelty	Common target	CLEC5A	50	40	39
Medium novelty	Common target	RAB1B	50	41.5714	40
Medium novelty	Common target	BLK	50	43.7143	41
Medium novelty	Age-associated target	ITGA9	50	45.7143	42
Medium novelty	Common target	MTHFD2	50	45.8571	43
Medium novelty	Common target	RHOT2	50	53.2857	44
Medium novelty	Age-associated target	RAB5C	50	56.7143	45
Medium novelty	Age-associated target	ARF5	50	58.2857	46
Medium novelty	Age-associated target	KAT6A	50	59	47
Medium novelty	Age-associated target	RAB14	50	63.4286	48
Medium novelty	Age-associated target	DDX17	50	70.2857	49
Medium novelty	Common target	PELI1	42.8571	17.6667	50
Medium novelty	Common target	PPP3CA	42.8571	20	51
Medium novelty	Age-associated target	ITGA8	42.8571	25.5	52
Medium novelty	Common target	ITGB8	42.8571	26	53
Medium novelty	Common target	SKIV2L	42.8571	26.3333	54
Medium novelty	Age-associated target	UBE2G1	42.8571	28.6667	55
Medium novelty	Age-associated target	ARL2	42.8571	45.3333	56
Medium novelty	Common target	UBE2D2	42.8571	46.1667	57
Medium novelty	Common target	P4HA2	42.8571	46.1667	58
Medium novelty	Common target	TNIK	42.8571	46.33	59
Medium novelty	Age-associated target	FPR3	42.8571	49	60
Medium novelty	Age-associated target	DHX38	42.8571	49.8333	61
Medium novelty	Age-associated target	PLXNA4	42.8571	50	62
Medium novelty	Age-associated target	FAM20C	42.8571	50.1667	63
Medium novelty	Age-associated target	RNF5	42.8571	54.1667	64
Medium novelty	Common target	NEK7	42.8571	55	65
Medium novelty	Age-associated target	ITGB6	42.8571	55.5	66
Medium novelty	Common target	UBE2E3	42.8571	56.5	67
Medium novelty	Age-associated target	SCN3A	42.8571	57.5	68
Medium novelty	Age-associated target	AAK1	42.8571	74.5	69
Medium novelty	Age-associated target	TGS1	42.8571	75.5	70
Medium novelty	Age-associated target	DUSP9	35.7143	24.2	71
Medium novelty	Age-associated target	PLOD1	35.7143	26.8	72
Medium novelty	Age-associated target	UBE2E2	35.7143	27.4	73
Medium novelty	Common target	UBA3	35.7143	27.4	74
Medium novelty	Common target	CLEC12A	35.7143	34	75
Medium novelty	Common target	MAPKAPK5	35.7143	35.8	76
Medium novelty	Common target	RHOH	35.7143	38.2	77
Medium novelty	Age-associated target	CSNK1A1	35.7143	39.2	78
Medium novelty	Age-associated target	RAB32	35.7143	39.8	79
Medium novelty	Common target	EPHB6	35.7143	40.2	80
Medium novelty	Age-associated target	FZD8	35.7143	41	81
Medium novelty	Age-associated target	SETD1B	35.7143	43.4	82
Medium novelty	Common target	CD300A	35.7143	46.2	83
Medium novelty	Age-associated target	PLOD3	35.7143	50	84
Medium novelty	Common target	PYGL	35.7143	51.6	85
Medium novelty	Age-associated target	USP2	35.7143	53.2	86
Medium novelty	Age-associated target	SUCNR1	35.7143	55	87
Medium novelty	Common target	RAB13	35.7143	56.4	88
Medium novelty	Common target	DUSP3	35.7143	57	89
Medium novelty	Common target	IRAK2	35.7143	57.4	90
Medium novelty	Age-associated target	UBE2B	35.7143	58.2	91
Medium novelty	Age-associated target	BDKRB1	35.7143	58.4	92
Medium novelty	Age-associated target	GALNT1	35.7143	59	93
Medium novelty	Common target	MMP25	35.7143	59.4	94
Medium novelty	Common target	RAB7A	35.7143	60.8	95
Medium novelty	Common target	UCHL5	35.7143	63.4	96
Medium novelty	Age-associated target	XRN2	35.7143	76.2	97
Medium novelty	Age-associated target	DDX39A	35.7143	77.8	98
Medium novelty	Common target	PFKP	28.5714	16.25	99
Medium novelty	Common target	BRCC3	28.5714	29.75	100
High novelty	Common target	PPP2CB	85.7143	17.1667	1
High novelty	Common target	CDC34	85.7143	25.1667	2
High novelty	Common target	FES	85.7143	37.1667	3
High novelty	Common target	RHOF	85.7143	49.25	4
High novelty	Common target	RAB24	85.7143	56.4167	5
High novelty	Common target	DUSP8	78.5714	23.6364	6
High novelty	Common target	HELZ2	78.5714	38.1818	7
High novelty	Common target	PRKAB1	78.5714	40.0909	8
High novelty	Common target	ITGA10	78.5714	41.3636	9
High novelty	Common target	PRKAG1	71.4286	25.6	10
High novelty	Common target	SPCS1	71.4286	33.8	11
High novelty	Common target	UBE2W	71.4286	46.6	12
High novelty	Common target	EDEM3	71.4286	49.2	13
High novelty	Common target	PIP5K1C	71.4286	49.6	14
High novelty	Common target	DUSP7	71.4286	50.9	15
High novelty	Common target	GAK	64.2857	21.8889	16
High novelty	Common target	SEC61G	64.2857	27.7778	17
High novelty	Common target	MX2	64.2857	29.2222	18
High novelty	Common target	PJA1	64.2857	36	19
High novelty	Age-associated target	ITGA11	64.2857	42	20
High novelty	Common target	MIB2	64.2857	44.2222	21
High novelty	Common target	UBE2O	64.2857	48.2222	22
High novelty	Common target	PELI3	64.2857	50.3333	23
High novelty	Common target	PJA2	64.2857	51.6667	24
High novelty	Age-associated target	ATAD3B	64.2857	62.6667	25
High novelty	Common target	PIP5K1B	57.1429	29.125	26
High novelty	Common target	GSPT2	57.1429	29.25	27
High novelty	Common target	INPP5B	57.1429	33.75	28
High novelty	Common target	KDM7A	57.1429	37.125	29
High novelty	Age-associated target	RFNG	57.1429	41.5	30
High novelty	Age-associated target	ADAMTS14	57.1429	41.75	31
High novelty	Common target	RNF14	57.1429	42.125	32
High novelty	Common target	CPPED1	57.1429	43.75	33
High novelty	Common target	RHOV	57.1429	44.125	34
High novelty	Common target	CSNK1G2	57.1429	44.75	35
High novelty	Common target	RAB8B	57.1429	44.875	36
High novelty	Common target	UBE2R2	57.1429	46.875	37
High novelty	Common target	UBE2Z	57.1429	48.375	38
High novelty	Common target	PPIL1	57.1429	49.125	39
High novelty	Common target	RAB9B	57.1429	50	40
High novelty	Common target	TRMT112	57.1429	50.125	41
High novelty	Common target	NME7	57.1429	52.25	42
High novelty	Common target	SPCS3	57.1429	54.5	43
High novelty	Common target	RNF144B	57.1429	58.875	44
High novelty	Age-associated target	MTMR4	57.1429	59.375	45
High novelty	Common target	P2RX1	50	18.4286	46
High novelty	Common target	ANAPC2	50	25.4286	47
High novelty	Age-associated target	TSEN15	50	28.4286	48
High novelty	Common target	RAB4B	50	31.4286	49
High novelty	Age-associated target	PPIL4	50	39.1429	50
High novelty	Common target	GNGT2	50	42	51
High novelty	Common target	RNF126	50	42.7143	52
High novelty	Common target	PPP5C	50	45.2857	53
High novelty	Age-associated target	RAB2B	50	46	54
High novelty	Common target	HERC6	50	49	55
High novelty	Age-associated target	IDH3G	50	52.7143	56
High novelty	Common target	RNF19B	50	54	57
High novelty	Common target	TECR	50	55.7143	58
High novelty	Common target	HECW2	50	55.8571	59
High novelty	Common target	RPP25	50	61.7143	60
High novelty	Age-associated target	STK10	50	63.5714	61
High novelty	Common target	MFNG	50	64.7143	62
High novelty	Age-associated target	RNF19A	50	68.1429	63
High novelty	Common target	RPP38	42.8571	35.1667	64
High novelty	Age-associated target	RAB33B	42.8571	35.1667	65
High novelty	Common target	UBE4A	42.8571	36.5	66
High novelty	Common target	PRSS23	42.8571	38.3333	67
High novelty	Age-associated target	RRAGD	42.8571	38.5	68
High novelty	Common target	MYSM1	42.8571	39.6667	69
High novelty	Age-associated target	NEURL1B	42.8571	41.1667	70
High novelty	Common target	B4GALT5	42.8571	43.6667	71
High novelty	Common target	PIP5K1A	42.8571	44.6667	72
High novelty	Age-associated target	OLA1	42.8571	44.8333	73
High novelty	Age-associated target	GPD1L	42.8571	44.8333	74
High novelty	Age-associated target	RCL1	42.8571	49.8333	75
High novelty	Age-associated target	DDX42	42.8571	51.1667	76
High novelty	Age-associated target	RAB7B	42.8571	52.5	77
High novelty	Age-associated target	TRMT11	42.8571	53.1667	78
High novelty	Age-associated target	RNF139	42.8571	55	79
High novelty	Common target	LILRA5	42.8571	57.1667	80
High novelty	Age-associated target	SPCS2	42.8571	57.3333	81
High novelty	Age-associated target	AGPAT1	42.8571	57.6667	82
High novelty	Age-associated target	RNASE6	42.8571	58.5	83
High novelty	Common target	SEC11A	42.8571	59.3333	84
High novelty	Common target	CHD9	42.8571	60.5	85
High novelty	Common target	RNF125	42.8571	60.5	86
High novelty	Age-associated target	DDX52	42.8571	66.6667	87
High novelty	Age-associated target	HECTD3	42.8571	72.3333	88
High novelty	Age-associated target	CTSO	42.8571	73.6667	89
High novelty	Age-associated target	DDX49	42.8571	73.6667	90
High novelty	Common target	RPP40	42.8571	77.1667	91
High novelty	Common target	LRP10	35.7143	27.6	92
High novelty	Common target	CLOCK	35.7143	28.2	93
High novelty	Common target	RAP2C	35.7143	28.2	94
High novelty	Age-associated target	SEC61A2	35.7143	29.8	95
High novelty	Common target	CNOT6L	35.7143	30.2	96
High novelty	Common target	UBE2G2	35.7143	32	97
High novelty	Common target	HK3	35.7143	39.6	98
High novelty	Common target	PELI2	35.7143	40.6	99
High novelty	Common target	FCGR1B	35.7143	41	100
[1] Top-100 genes of the age-associated diseases that overlap with those of the non-age-associated diseases were categorized as common targets
[2] Percentage of the diseases in which a gene is ranked top-100 by PandaOmics
[3] Average ranking of the gene in its associated diseases calculated by PandaOmics
[4] Final ranking of the gene based on their occurence percentage and average ranking

## Sheet: Supplementary Table 2
Supplementary Table 2. Genes associated with hallmarks of aging.
Search terms on PubMed: (Gene[Title/Abstract]) AND ((senescence[Title/Abstract]) OR (longevity[Title/Abstract]) OR (aging[Title/Abstract]) OR (ageing[Title/Abstract]) OR (epigenetic[Title/Abstract]) OR (apoptosis[Title/Abstract]) OR (extracellular matrix[Title/Abstract]) OR (stem cell[Title/Abstract]) OR (genome instability[Title/Abstract]) OR (genomic instability[Title/Abstract]) OR (proteostasi…
Gene [1]	Target family	Hallmark of aging [2]	Role in aging [3]	PMID	Number of clincial trials [4]	Tissue enrichment [5]
AAK1	Protein kinase	Altered intercellular communications	AAK1 is a positive regulator of the Notch pathways, Notch pathway is a master controller of the neural stem cell and neural development maintaining a significant role in the normal brain function	21464124, 25416974	2	Parathyroid gland
ABL1	Tyrosine kinase	Genomic instability	It is cancer driver gene, so its safety for long-term use needs to be further evaluated	26593906	115	Low tissue specificity
ADAM17	Peptidase	Altered intercellular communications	ADAM17 regulates TGFβ signaling TGFβ signaling plays critcial role in regulating cellular senescence, stem cell aging, and aging-related diseases	21170088, 31658594	465	Low tissue specificity
ADAMTS14	Peptidase	Extracellular matrix stiffness	ADAMTS14 is responsible for degradation of ECM collagen. During aging, fibroblast-ECM interactions become disrupted due to fragmentation of collagen fibrils. Fibroblasts synthesize less ECM proteins and more matrix-degrading metalloproteinases	11779638	0	Brain, gallbladder, placenta
AKT1	AGC kinase	Altered intercellular communications, Cellular senescence, Deregulated nutrient signaling, Epigenetic shift, Extracellular matrix stiffness, Genomic instability, Impaired proteostasis, Inflammation, Mitochondrial dysfunction, Retrotranspositions, Stem cell exhaustion, Telomere attrition	It is cancer driver gene, so its safety for long-term use needs to be further evaluated	23862686, 23787999, 32929041, 20354168	104	Low tissue specificity
AR	Nuclear receptor	Cellular senescence, Inflammation	It is tumor suppressor, so there may be a safety concern for long-term use	30305328, 22403609	266	Liver
ARL2	Hydrolase	Mitochondrial dysfunction	ARL2 is an effector upstream of ELMOD2 and promote to promote mitochondrial fusion via ELMD2; ARL2 regulates both mitochondrial fusion and microtubule dynamics	30865555, 27400436	0	Low tissue specificity
ATAD3B	Hydrolase	Mitochondrial dysfunction	It is cancer driver gene, so its safety for long-term use needs to be further evaluated	33665835	0	Low tissue specificity
BLK	Tyrosine kinase	Deregulated nutrient signaling	It is cancer driver gene, so its safety for long-term use needs to be further evaluated	19667185	0	Blood, intestine, lymphoid tissue
BMP2	Growth factor	Stem cell exhaustion	BMP2 is a member of TGF-β superfamily and is one of the main chondrogenic growth factors invovled in cartilage regeneration. BMP2 induces chondrogenic differentiation, osteogenic differentiation and endochondral ossification in stem cells.	27083447, 31658594	66	Low tissue specificity
BRCC3	Peptidase	Inflammation, Retrotranspositions	It is cancer driver gene, so its safety for long-term use needs to be further evaluated	23246432, 34850961	0	Low tissue specificity
CASP1	Peptidase	Genomic instability, Inflammation	Caspase-1 is a cysteine protease that converts the inactive proform of IL-1β to the active inflammatory cytokine	25815426, 33116753,	21	Blood, lymphoid tissue
CASP3	Peptidase	Extracellular matrix stiffness, Genomic instability, Inflammation	It is cancer driver gene, so its safety for long-term use needs to be further evaluated	18658137, 25180606, 11602613	150	Blood
CASP8	Peptidase	Genomic instability, Inflammation, Retrotranspositions	It is cancer driver gene, so its safety for long-term use needs to be further evaluated	25451151, 31748744	25	Blood
CAT	Oxidoreductase	Genomic instability	PPARα activation triggers catalase (CAT) expression and ROS scavenging, thereby protecting skin from UV-induced damage and intrinsic aging.	27611371	96	Liver
CD36	Scavenger receptor	Deregulated nutrient signaling, Inflammation	It is cancer driver gene, so its safety for long-term use needs to be further evaluated	29705240	31	Adipose tissue, breast
CDC34	Receptor	Impaired proteostasis	CDC34 is a E2 ubiquitin conjugating enzyme that responsible for attaching ubiquitin to cellular proteins, a essential step involved protein degradation	32268269, 31341161, 23656784	0	Low tissue specificity
CHD9	Hydrolase	Altered intercellular communications	It is cancer driver gene, so its safety for long-term use needs to be further evaluated	30923228, 29681568	0	Low tissue specificity
CHUK	Protein kinase	Cellular senescence, Extracellular matrix stiffness, Genomic instability	mTORC2/Akt/IKKα(CHUK) signaling pathway led to NF-κB activation in both intrinsic and photo-induced skin aging. Geroprotector, N-acetyl-L-cysteine targets CHUK	24023802, 34474146, 27486771, 20819793	9	Low tissue specificity
CLEC5A	Scavenger receptor	Inflammation, Retrotranspositions	CLEC5A knockdown protects against cardiac dysfunction after myocardial infarction by suppressing macrophage polarization, NLRP3 inflammasome activation, and pyroptosis	33939927	2	Bone marrow
CNOT6L	Esterase	Cellular senescence, Genomic instability	CNOT6L as a key regulator of insulin-like growth factor-binding protein 5, which mediates cell cycle arrest and senescence via a p53-dependent pathway.	21233283	0	Lymphoid tissue
CSNK1A1	Protein kinase	Genomic instability, Inflammation	CSNK1A1 as a regulator of the DNA damage response in embryonic stem cells	23948294, 23354688	1	Low tissue specificity
CXCL12	Chemokine	Inflammation, Stem cell exhaustion	Aging-upregulated gene; Mediators of crosstalk between vascular cells and many brain cell types	23128103	90	Low tissue specificity
CXCR4	GPCR	Inflammation, Retrotranspositions, Stem cell exhaustion	It is cancer driver gene, so its safety for long-term use needs to be further evaluated	34536822, 27886253	114	Bone marrow, lymphoid tissue
DDX17	Hydrolase	Inflammation, Retrotranspositions	It is cancer driver gene, so its safety for long-term use needs to be further evaluated	34860583, 34876701	0	Low tissue specificity
DDX21	Hydrolase	Telomere attrition	DDX21 directly interacts with telomeric repeat containing RNA quadruplex that regulates telomere length	29906500	0	Low tissue specificity
DNMT1	Methyltransferase	Epigenetic shift, Extracellular matrix stiffness, Genomic instability, Inflammation, Retrotranspositions, Stem cell exhaustion, Telomere attrition	It is cancer driver gene, so its safety for long-term use needs to be further evaluated	16565708, 20940144, 34299198, 19796624, 21572997, 29182961	45	Low tissue specificity
DUSP3	Esterase	Cellular senescence, Genomic instability	DUSP3 maintains genomic stability and cell proliferation by modulating NER pathway and cell cycle regulatory proteins	32380926	0	Skeletal muscle
EGFR	Receptor kinase	Cellular senescence, Deregulated nutrient signaling, Extracellular matrix stiffness, Genomic instability, Impaired proteostasis, Inflammation	EGFR is tumor suppressor gene, so there may be a safety concern for long-term use	21931179, 28433699, 32323422, 3501286, 25647660, 30910997	3325	Placenta
EGLN1	Oxidoreductase	Altered intercellular communications, Cellular senescence, Inflammation, Stem cell exhaustion	(PHD2/EGLN1), the major downregulator of HIFα subunits. HIFα stabilization can thus mediate non-erythropoietin-driven splenic erythropoiesis via altered Notch signaling EGLN1 modulates HIF-1alpha activity and induce cell senescence in cancer. HIFs and prolyl hydroxylase domain enzymes (PHDs) iis involved in inflammation and hypoxia Reduction of HIF-1alpha and HIF-1 target genes such as the vascul…	27821476, 30442494, 16041620	3	Skeletal muscle
EP300	Acyltransferase	Cellular senescence, Genomic instability, Epigenetic shift, Stem cell exhaustion	It is cancer driver gene, so its safety for long-term use needs to be further evaluated	31735627, 31110176, 24270410, 31504229	84	Low tissue specificity
ESR1	Nuclear receptor	Genomic instability	It is cancer driver gene, so its safety for long-term use needs to be further evaluated	12777700	701	Cervix, uterine, endometrium
EZH2	Methyltransferase	Cellular senescence, Epigenetic shift, Inflammation	It is cancer driver gene, so its safety for long-term use needs to be further evaluated	29590617, 30220457, 31160593, 33137873	41	Bone marrow, lymphoid tissue
FAM20C	Protein kinase	Extracellular matrix stiffness	FAM20C is an ECM protein that may play an important role in controlling the mineralization of bone and tooth	20644212, 24874551	0	Salivary gland
FGF2	Growth factor	Deregulated nutrient signaling, Extracellular matrix stiffness, Stem cell exhaustion	It is cancer driver genes, so there may be a safety concern for long-term use	32669047, 32129003	207	Low tissue specificity
FZD8	GPCR	Altered intercellular communications	FZD8 can activate canonical wnt/beta-catenin signaling. FZD8 is a member of the frizzled gene family. Most frizzled receptors are coupled to the beta-catenin canonical signaling pathway. Wnt/β-catenin signaling plays an important role in stem cell aging.	28602974, 23124852	0	Low tissue specificity
GAK	Protein kinase	Impaired proteostasis, Mitochondrial dysfunction	GAK is positive regulators of PRKN-independent mitophagy,	34671015	0	Low tissue specificity
GALNT1	Glycosyltransferase	Extracellular matrix stiffness	Ablation of Galnt1 appears to disrupt ECM formation/remodeling	25615642	0	Low tissue specificity
GSK3B	CMGC kinase	Altered intercellular communications, Stem cell exhaustion	GSK3B is tumor suppressor, so there may be a safety concern for long-term use	32991030	12	Low tissue specificity
HCK	Tyrosine kinase	Inflammation, Retrotranspositions	HCK is essential for NLRP3 inflammasome activation and LPS-induced inflammatory response	33041826	1	Blood, bone marrow, lymphoid tissue
HDAC1	Hydrolase	Epigenetic shift, Genomic instability	It is cancer driver genes, so there may be a safety concern for long-term use	22414492, 25942572	5	Low tissue specificity
HDAC6	Hydrolase	Cellular senescence	HDAC6 inhibitor induces apoptosis and suppresses IFN-γ-induced programmed death-ligand in cancer	31652644	13	Low tissue specificity
HDAC9	Hydrolase	Epigenetic shift	It is cancer driver genes, so there may be a safety concern for long-term use	34006836	232	Low tissue specificity
HGF	Growth factor	Altered intercellular communications, Cellular senescence, Deregulated nutrient signaling, Extracellular matrix stiffness, Genomic instability, Impaired proteostasis, Inflammation, Mitochondrial dysfunction, Stem cell exhaustion	It is cancer driver genes, so there may be a safety concern for long-term use	11134526, 25476732, 16100005, 32736659, 32065021, 11929826, 30214428, 29017538	106	Placenta
HSPA5	Hydrolase	Impaired proteostasis, Mitochondrial dysfunction	HSPA5, also called GRP78 or BiP, is a master regulator of the UPR, reducing ER stress levels and apoptosis due to an enhancement of the cellular folding capacity. GRP78 controls maturation and secretion of neuronal factors for proper neural migration and offers neuroprotection	26797053, 28333162, 19309259	11	Low tissue specificity
IGF1	Growth factor	Altered intercellular communications, Cellular senescence, Deregulated nutrient signaling, Epigenetic shift, Extracellular matrix stiffness, Genomic instability, Impaired proteostasis, Inflammation, Mitochondrial dysfunction, Retrotranspositions, Stem cell exhaustion, Telomere attrition	Well-known anti-aging target. Insulin/insulin-like growth factor (IGF) signaling plays a major role in the control of aging and life span	12888255, 19913048, 30116397, 28655914, 29882416, 25070626, 11313952, 28981462, 8853393, 25869012	691	Low tissue specificity
IGF1R	Receptor kinase	Deregulated nutrient signaling, Genomic instability, Inflammation, Mitochondrial dysfunction, Retrotranspositions, Stem cell exhaustion	It is cancer driver gene, so its safety for long-term use needs to be further evaluated	33562061	127	Low tissue specificity
IGF2	Growth factor	Deregulated nutrient signaling, Stem cell exhaustion	It is cancer driver gene, so its safety for long-term use needs to be further evaluated	31680642, 28007480	51	Placenta
IKBKB	Protein kinase	Cellular senescence, Impaired proteostasis, Inflammation, Genomic instability, Stem cell exhaustion	It is cancer driver gene, so its safety for long-term use needs to be further evaluated	33459422, 29929436, 33060560, 23332762, 28377875 18631321, 20819793	6	Low tissue specificity
IL1B	Interleukin	Genomic instability, Inflammation, Mitochondrial dysfunction, Retrotranspositions, Stem cell exhaustion, Telomere attrition	It is cancer driver gene, so its safety for long-term use needs to be further evaluated	8760825, 24086293, 27111842, 25163844, 30952515, 16679036	320	Bone marrow, lymphoid tissue
IL6	Interleukin	Altered intercellular communications, Cellular senescence, Deregulated nutrient signaling, Impaired proteostasis, Inflammation, Mitochondrial dysfunction, Stem cell exhaustion	IL-6/IL-6 receptor complex promotes osteogenic differentiation of bone marrow-derived mesenchymal stem cells. IL-6 inhibits Wnt signaling in synovial fibroblasts and osteoblasts	29357923, 29280266, 27106351, 27094713, 34131122	942	Adipose tissue, lymphoid tissue
IMPDH2	Oxidoreductase	Altered intercellular communications, Deregulated nutrient signaling	IMPDH2 can activate Wnt/catenin and PI3K/AKT/mTOR, PI3k/AKT/FOXO1 signaling pathways	32963625, 30518405	1	Low tissue specificity
INSR	Receptor kinase	Deregulated nutrient signaling	It is cancer driver gene, so its safety for long-term use needs to be further evaluated	29155986	98	Pancreas
ITGA11	Receptor	Extracellular matrix stiffness	ECM stiffness in increased with aging due to non-enzymatic cross-link formation. ECM affects intracellular processes via integrins, and integrins’ reaction to increased ECM stiffness leads to ROS (reactive oxidative species) production	3254039	0	Cervix, uterine, endometrium, smooth muscle
ITGAM	Receptor	Inflammation	ITGAM can regulate macrophages polarization and immune checkpoints expression in osteosarcoma	34588497	69	Bone marrow
ITGAV	Receptor	Altered intercellular communications, Deregulated nutrient signaling, Extracellular matrix stiffness	It is cancer driver gene, so its safety for long-term use needs to be further evaluated	15184403, 19578119	5	Low tissue specificity
ITGB2	Receptor	Mitochondrial dysfunction	ITGB2-mediated metabolic switch in CAFs promotes OSCC proliferation by oxidation of NADH in mitochondrial oxidative phosphorylation system	33204328	18	Blood, bone marrow, lymphoid tissue
ITGB5	Receptor	Altered intercellular communications, Extracellular matrix stiffness	With increasing age, stem cell functional abilities decline, resulting in reduced organ function and delays in tissue repair. Comparison of three profiling experiments with aged HSCs yielded 77 transcripts that were shared among all three studies, those genes were enriched TGF-β receptor signaling pathway are ITGB5, TGFB1, FOS and PTPRK. ECM stiffness is increased with aging due to non-enzymatic …	29070608, 3254039, 12571101	1	Low tissue specificity
ITK	Tyrosine kinase	Inflammation	ITK signals promote neuroinflammation by regulating CD4+ T-cell activation and trafficking	25568116	2	Blood, bone marrow, lymphoid tissue
JAK1	Tyrosine kinase	Inflammation	It is cancer driver gene, so its safety for long-term use needs to be further evaluated	33475190	66	Low tissue specificity
JAK2	Tyrosine kinase	Altered intercellular communications, Cellular senescence, Genomic instability, Inflammation	It is cancer driver gene, so its safety for long-term use needs to be further evaluated	34663512, 34532448, 34152720	129	Low tissue specificity
KAT6A	Acyltransferase	Cellular senescence, Epigenetic shift, Stem cell exhaustion	It is cancer driver gene, so its safety for long-term use needs to be further evaluated	33541408, 33130515, 25772242	0	Low tissue specificity
KAT8	Acyltransferase	Epigenetic shift	KAT8 is critical for acetylation of histone H4 at lysine 16, an evolutionarily conserved epigenetic mark.	31794431	0	Low tissue specificity
KDM7A	Oxidoreductase	Altered intercellular communications, Epigenetic shift	Age-related neural dedifferentiation may contribute to many cognitive abilities decline with age. KDM7A regulates neural differentiation through FGF4 . KDM7A is associated with Wnt signaling	34395453,	0	Low tissue specificity
KDR	Receptor kinase	Deregulated nutrient signaling, Genomic instability, Inflammation	It is cancer driver gene, so its safety for long-term use needs to be further evaluated	25182240, 12620408, 29531793, 11468554	628	Low tissue specificity
KIT	Receptor kinase	Deregulated nutrient signaling	It is cancer driver gene, so its safety for long-term use needs to be further evaluated		311	Breast
LOX	Oxidoreductase	Extracellular matrix stiffness, Inflammation	Inhibition of LOX-1 prevents inflammation and photoreceptor cell death in retinal degeneration. LOX-1 is invovled in ECM breakdown.	31945611, 28898769	11	Low tissue specificity
LPIN2	Esterase	Inflammation, Retrotranspositions	LPIN2-genetic deficiency is associated with an autoinflammatory disorder, and regulates NLRP3 inflammasome.	32008742, 28031477	0	Liver
LYN	Tyrosine kinase	Inflammation, Retrotranspositions	It is cancer driver gene, so its safety for long-term use needs to be further evaluated	34699250, 29263906	0	Lymphoid tissue
MAPK1	CMGC kinase	Impaired proteostasis, Inflammation	It is cancer driver gene, so its safety for long-term use needs to be further evaluated	33760166, 30787203	18	Brain
MAPK14	CMGC kinase	Impaired proteostasis, Stem cell exhaustion	MAPK14/p38 was required for mitophagy. mitophagy in mammalian cells predominantly occurs through an alternative autophagy pathway, requiring the MAPK1 and MAPK14 signaling pathways. MAPK14 as a druggable suppressor of human hematopoietic stem cell expansion	25831013, 22555972	31	Low tissue specificity
MAPK8	CMGC kinase	Genomic instability	MAPK8/JNK and MAPK8/ERK signaling pathways are involved in mediating apoptosis	31938330, 23051914	6	Low tissue specificity
MIB2	Acyltransferase	Altered intercellular communications	Mib2, an E3 ubiquitin ligase, has been reported to regulate Notch signaling and participate in the peripheral immune system. CYLD interacts with MIB2 to regulate notch signaling	32489699, 25565632	0	Skeletal muscle
MMP1	Peptidase	Altered intercellular communications, Cellular senescence, Extracellular matrix stiffness	MMPs target a wide range of ECM and other extracellular proteins. MMP-1 prefers collagen III	34369270, 33684534	43	Gallbladder, stomach
MMP2	Peptidase	Extracellular matrix stiffness, Inflammation	MMP2 has fibronectin type II repeats inserted in the catalytic domain to mediate collagen binding and thereby mediate ECM organisation. MMP2 as critical regulator of inflammation-mediated vascular dysfunction	27028474, 31362036, 29040383	147	Low tissue specificity
MMP25	Peptidase	Extracellular matrix stiffness	MMP25 may activate progelatinase A.	26548368, uniprot.org	0	Blood, bone marrow, lymphoid tissue
MMP7	Peptidase	Extracellular matrix stiffness	MMP7 can degrade some of the ECM proteins. MMP7 can degrade casein, gelatins of types I, III, IV, and V, and fibronectin. MMP7 activates procollagenase.	27028474	17	Gallbladder, kidney, salivary gland
MMP9	Peptidase	Extracellular matrix stiffness, Genomic instability	MMP9 mediates ECM organisation as well as induce cell apoptosis in the developement of diabetic retinopathy via regulating by Ang2 or targeting apoptotic proteins	26617754, 32170070	203	Adipose tissue, blood, bone marrow, lymphoid tissue
MTHFD2	Oxidoreductase	Mitochondrial dysfunction	It is cancer driver gene, so its safety for long-term use needs to be further evaluated	32679066	0	Low tissue specificity
MTMR4	Esterase	Altered intercellular communications	Skeletal muscle atrophy accompanies many chronic disease states and normal aging	20061380	0	Low tissue specificity
MTOR	Protein kinase	Altered intercellular communications, Cellular senescence, Deregulated nutrient signaling, Epigenetic shift, Extracellular matrix stiffness, Genomic instability, Impaired proteostasis, Inflammation, Mitochondrial dysfunction, Retrotranspositions, Stem cell exhaustion, Telomere attrition	Well-known anti-aging targets. At anti-aging doses, rapamycin (mTOR inhibitor) “eliminates hyperimmunity rather than suppresses immunity”, and it can act as immunostimulators. mTOR inhibition improves immune function and reduces infections in the elderly . Inhibition of mTOR with rapamycin expands maximal and median life span in mice. This effect was observed even when the treatment was initiated…	24389041, 27569211, 17012837, 25540326, 29997249, 20974732, 19587680	713	Low tissue specificity
MYO1C	Hydrolase	Epigenetic shift	MYO1C and KAT6B are interacting in chromatin remodelling for gene expression. This is the nuclear myosin1 (NM1) function of MYO1C.	24698832	0	Low tissue specificity
MYSM1	Peptidase	Cellular senescence, Inflammation, Stem cell exhaustion	MYSM1 functionally reduced cellular senescence and the aging process. MYSM1 deficiency promoted the aging process and decreased lifespan while MYSM1 overexpression inhibited the aging process and increases lifespan in vivo.	33240758, 29694335, 26474655	0	Low tissue specificity
NEK7	Protein kinase	Inflammation, Retrotranspositions	NEK7 is an essential mediator of NLRP3 activation	34428935, 26814970	0	Low tissue specificity
NGF	Growth factor	Deregulated nutrient signaling	NGF can mediate PI3K/Akt signaling	30670632	130	Low tissue specificity
NME7	Non-protein kinase	Stem cell exhaustion	Nme7 is crucial for embryonic stem cell renewal	22899353	0	Low tissue specificity
NOTCH1	Receptor	Altered intercellular communications	It is cancer driver gene, so its safety for long-term use needs to be further evaluated	27328278	31	Low tissue specificity
OLA1	Hydrolase	Mitochondrial dysfunction	Decreased OLA1 expression drives ubiquitin-proteasome pathways to downregulate mitochondrial SOD2 in persistent pulmonary hypertension	31476900	0	Low tissue specificity
PARP1	Glycosyltransferase	Cellular senescence, Genomic instability, Telomere attrition	Age-dependent telomere shortening occurs in DMD muscles and is associated to overexpression of mRNA and protein levels of TRF1 and PARP1. miR-7 acted as an important regulator of cellular senescence by targeting PARP1/NF-κB signaling.	34733488, 33552258, 22614020, 20137830	63	Low tissue specificity
PELI1	Acyltransferase	Inflammation, Retrotranspositions	PELI1 regulates NLRP3 inflammasome activation	34706239	0	Bone marrow
PIP5K1A	Non-protein kinase	Deregulated nutrient signaling	PIP5K1A is able to activate PI3K/AKT pathway	25071204	0	Low tissue specificity
PJA2	Acyltransferase	Altered intercellular communications	PJA2 inhibits Wnt/β-catenin signaling by binding to TCF/LEF1	30021253	0	Low tissue specificity
PLOD1	Oxidoreductase	Extracellular matrix stiffness	PLOD1 is crucial for bone mineral density and bone quality by catalysing collagen hydroxylation	30003082	0	Low tissue specificity
PLOD3	Oxidoreductase	Extracellular matrix stiffness	PLOD3 is crucial for the normal biosynthesis and function of collagen	30003082	0	Low tissue specificity
POLA1	Transferase	Telomere attrition	POLA1 contributes to the polymerase complex that interacts with CST to regulate telomerase activity, telomere maintenance and protection	25519149	0	Low tissue specificity
PPARA	Nuclear receptor	Impaired proteostasis, Stem cell exhaustion	PPARα activation triggers catalase expression and ROS scavenging, thereby protecting skin from UV-induced damage and intrinsic aging.	30898012, 25970251, 33466690 27611371	149	Tongue
PPIL4	Isomerase	Altered intercellular communications	It is cancer driver gene, so its safety for long-term use needs to be further evaluated	34887573	0	Low tissue specificity
PPM1A	Esterase	Altered intercellular communications, Inflammation	PPM1A stimulates macrophages to produce TNF through TLR4 in ECM	31791585	0	Low tissue specificity
PRKAG1	Protein kinase	Impaired proteostasis, Mitochondrial dysfunction	It is cancer driver gene, so its safety for long-term use needs to be further evaluated	31983282	0	Low tissue specificity
PSMD14	Peptidase	Impaired proteostasis, Mitochondrial dysfunction	PSMD14 regulates macroautophagy by controlling Golgi-to-ER retrograde transport	32210007, 30590814	0	Low tissue specificity
PTEN	Esterase	Cellular senescence, Deregulated nutrient signaling, Genomic instability	PTEN is tumor suppressor gene, so its safety for long-term use needs to be further evaluated	22266095	278	Low tissue specificity
PTK2	Tyrosine kinase	Cellular senescence, Genomic instability	It is cancer driver gene, so its safety for long-term use needs to be further evaluated	30761269	1	Low tissue specificity
RAB13	Hydrolase	Deregulated nutrient signaling, Impaired proteostasis, Mitochondrial dysfunction	RAB13 regulates GLUT4 translocation in muscle cells in an insulin-induced manner; RAB13 promotes macroautophagy in vascular endothelial cells	21041651, 28087344	0	Low tissue specificity
RAB14	Hydrolase	Extracellular matrix stiffness	It is cancer driver gene, so its safety for long-term use needs to be further evaluated	23606746	0	Low tissue specificity
RAB31	Hydrolase	Impaired proteostasis, Mitochondrial dysfunction	RAB31 is associated with cell autophagy	26165933	0	Low tissue specificity
RAB32	Hydrolase	Genomic instability, Mitochondrial dysfunction	RAB32 modulates apoptosis onset and mitochondrial-associated membrane properties	20670942, 34743744	0	Bone marrow
RAB33B	Hydrolase	Impaired proteostasis, Mitochondrial dysfunction	RAB33B is associated with autophagy	31408960	0	Low tissue specificity
RAB4B	Hydrolase	Deregulated nutrient signaling	RAB4B deficiency in T cells promotes insulin resistance	30566860, 22824427	0	Low tissue specificity
RAB5C	Hydrolase	Altered intercellular communications, Stem cell exhaustion	RAB5C regulates hematopoietic stem and progenitor cell development via NOTCH and AKT signaling pathway	32275659	1	Low tissue specificity
RAB7A	Hydrolase	Mitochondrial dysfunction	RAB7A is involved in the shuttling between late endosomes and mitochondria to enable mitophagy for degrading depolarised mitochondria	34432599, 30857122, 30627666	0	Low tissue specificity
RAB7B	Hydrolase	Impaired proteostasis, Inflammation, Mitochondrial dysfunction	RAB7B negatively regulates TLR4 signaling in macrophages by promoting lysosomal degradation of TLR4. It also modulates macroautophagy by interacting with ATG4B	17395780, 28835545, 30911939	1	Adipose tissue, skin
RAB8B	Hydrolase	Altered intercellular communications, Impaired proteostasis, Mitochondrial dysfunction	RAB8B is related to macroautophagy and is required for Wnt/β-catenin signaling	32557804, 24035388	0	Low tissue specificity
RAP2C	Hydrolase	Extracellular matrix stiffness	RAP2C plays a crucial role in regulating fibroblast proliferation, contraction and ECM production	34046891	0	Endometrium
RHOA	Hydrolase	Altered intercellular communications	It is cancer driver gene, so its safety for long-term use needs to be further evaluated	33655459	5	Low tissue specificity
RHOT1	Hydrolase	Mitochondrial dysfunction	RHOT1 is related to the regulation of mitochondrial homeostasis. RHOT1 and RHOT2 can fine-tune actin- and tubulin-dependent mitochondrial motility and positioning.	29311115, 34152608	0	Low tissue specificity
RHOT2	Hydrolase	Mitochondrial dysfunction	RHOT2 plays an active role in the process of mitophagy	30806158	0	Low tissue specificity
RHOU	Hydrolase	Altered intercellular communications	RHOU is induced by the WNT signaling pathway, maybe involved in mediating their effects on cell migration	19397496	0	Brain
RNF125	Acyltransferase	Inflammation, Retrotranspositions	RNF125 causes sequential ubiquination of NLRP3 to limit inflammasome activation	31999304	0	Low tissue specificity
RNF126	Acyltransferase	Genomic instability	RNF126 is reponsible for regulating homologous recombination-mediated repair of DNA double-strand breaks	30529286, 33149608	0	Low tissue specificity
RNF14	Acyltransferase	Extracellular matrix stiffness, Mitochondrial dysfunction	RNF14 is a regulator of mitochondrial and immune function in muscle. Its variant also causes the downregulation of genes involved in extracellular matrix organisation	24472305	0	Low tissue specificity
RNF5	Acyltransferase	Impaired proteostasis, Mitochondrial dysfunction	RNF5 functions to regulate macroautophagy by ubiquitination and degradation of a membrane-associated pool of ATG4B and subsequent control of LC3 processing	23090345	0	Low tissue specificity
ROCK1	AGC kinase	Cellular senescence, Genomic instability, Stem cell exhaustion	ROCK1 modules apoptosis by targeting p53 and tendon stem/progenitor cell senescence	33297931, 25460182	3	Low tissue specificity
RRAGD	Hydrolase	Deregulated nutrient signaling	RRAGD regulates mTORC1 translocation to the lysosomal surface for activation.	30159546, 30145926	0	Skeletal muscle
SETD1B	Methyltransferase	Stem cell exhaustion	It is cancer driver gene, so its safety for long-term use needs to be further evaluated	29916805	0	Low tissue specificity
SIRT1	Acyltransferase	Altered intercellular communications, Cellular senescence, Deregulated nutrient signaling, Epigenetic shift, Extracellular matrix stiffness, Genomic instability, Impaired proteostasis, Inflammation, Mitochondrial dysfunction, Retrotranspositions, Stem cell exhaustion, Telomere attrition	SIRT1 is a well-known aging-associated gene. Promotes tissue regeneration in zebrafish through regulating the mitochondrial unfolded protein response Responsible for mitochondrial respiration Antagonises oxidative stress Contributes to telomere maintenance and augments global homologous recombination Enhances survival of human ESCs by promoting DNA repair, also regulates other adult stem cells su…	34622167, 32961796, 30300140, 33304318, 21187328, 33038659, 30526767, 27776347, 30526767, 27908642, 29201214, 20169165	63	Low tissue specificity
SOD2	Oxidoreductase	Mitochondrial dysfunction	SOD2 is reponsible for eliminating reactive oxygen species in mitochondria	34093596, 12551919	20	Blood, skeletal muscle
SPP1	Cytokine	Extracellular matrix stiffness, Inflammation, Stem cell exhaustion	SPP1 interacts with integrins to mediate cell migration, adhesion and survival Functions as a Th1 cytokine to promote cell-mediated immune responses Attenuates aging-associated phenotypes of hematopoietic stem cells	19798593, 22261033, 28507084	78	Gallbladder, kidney, placenta
SRC	Tyrosine kinase	Cellular senescence, Mitochondrial dysfunction	It is cancer driver gene, so its safety for long-term use needs to be further evaluated	34675187, 33153232	16	Low tissue specificity
TGFB1	Growth factor	Altered intercellular communications, Cellular senescence, Stem cell exhaustion	TGFB has been shown to regulate cellular senescence Exerts pleiotropic effects on the regulation of various tissue-specific stem cells, such as MSCs, HSCs, neural stem cells, hair follicle stem cells	31658594	274	Low tissue specificity
TGFBR2	Receptor kinase	Cellular senescence	It is cancer driver gene, so its safety for long-term use needs to be further evaluated	31658594	13	Low tissue specificity
TGS1	Methyltransferase	Telomere attrition	It is cancer driver gene, so its safety for long-term use needs to be further evaluated	34817067, 32023455	3	Low tissue specificity
TLR2	Receptor	Impaired proteostasis, Inflammation	It is cancer driver gene, so its safety for long-term use needs to be further evaluated	34866574, 34428765	47	Blood
TLR4	Receptor	Inflammation, Mitochondrial dysfunction	It is cancer driver gene, so its safety for long-term use needs to be further evaluated	34965485, 34959070	310	Low tissue specificity
TNF	Tumour necrosis factor	Altered intercellular communications, Inflammation, Telomere attrition	It is cancer driver gene, so its safety for long-term use needs to be further evaluated	29417795, 29490055	1753	Bone marrow, lymphoid tissue
TNIK	Protein kinase	Altered intercellular communications, Cellular senescence, Deregulated nutrient signaling, Extracellular matrix stiffness, Genomic instability, Stem cell exhaustion	TNIK acts as an essential activator of the Wnt signaling pathways, which in turn can stimulate the differentiation of resting fibroblasts into myofibroblasts. Myofibroblasts produces TGFβ, VEGF, CTGF, IL-1, IL-6, and IL-8 (inflammation). TNIK upregulates TGFB1, and in turn TGFβ can upregulate the expression of SIRT1 TNIK inhibitors can inhibit MMPs, TGFβ signaling. Knockdown of TNIK decreased the…	33244122, 22984420, 21710359, 25337707, 21710359, 19816403, 27528025	1	Brain
TRAF6	Acyltransferase	Extracellular matrix stiffness	It is cancer driver gene, so its safety for long-term use needs to be further evaluated	34371251	2	Low tissue specificity
UBE2E3	Acyltransferase	Cellular senescence, Impaired proteostasis, Stem cell exhaustion	UBE2E3 regulates cellular senescence and osteogenic differentiation of bone marrow stem cells during aging	34820159, 29879550	0	Low tissue specificity
UBE2M	Acyltransferase	Altered intercellular communications, Impaired proteostasis	UBE2M interacts with and modulates β-catenin stability, plays a role in Wnt signaling	19888210	2	Low tissue specificity
UBE2O	Acyltransferase	Genomic instability, Impaired proteostasis	UBE2O and USP7 co-regulate RECQL4 ubiquitinylation and homologous recombination-mediated DNA repair	28673317, 34921745	0	Low tissue specificity
UBE4A	Acyltransferase	Genomic instability, Impaired proteostasis	UBE4A adjusts protein ubiquitylation and accumulation at sites of DNA damage, facilitating double-strand break repair	29499138	0	Low tissue specificity
UCHL5	Peptidase	Impaired proteostasis, Inflammation	UCHL5 is a proteasome-associated deubiquitinase Causes activation of the NLRP3 inflammasome	33156996, 34431717	0	Low tissue specificity
USP2	Peptidase	Altered intercellular communications, Impaired proteostasis, Mitochondrial dysfunction	USP2 is related to the removal of reactive oxygen species, mitochondrial dysfunction and mitochondrial cell death Deubiquitinates and stabilises β-catenin	31353872, 30323974, 21293491	0	Skeletal muscle
VDR	Nuclear receptor	Impaired proteostasis, Inflammation	VDR is associated with regulating autophagy and inflammation	33889003, 34637036	153	Intestine, parathyroid gland
VEGFA	Growth factor	Deregulated nutrient signaling, Inflammation	VEGFA plays roles in activating PI3K/AKT signaling pathway and promoting angiogenesis and inflammation	31546232, 23755748	1934	Low tissue specificity
WWP1	Acyltransferase	Impaired proteostasis	It is cancer driver gene, so its safety for long-term use needs to be further evaluated	27107943	0	Low tissue specificity
[1] Total 145 potential targets in Figure 3
[2] The hallmark of aging associated with the gene based on literature evidence
[3] The role of the gene in aging based on their pathways or biological functions suggested by literatures
[4] Number of clinical trials for the gene was obtained from PharmaCognitive
[5] Tissue enrichment information obtained from the Human Protein Atlas

## Sheet: Supplementary Table 6
Supplementary Table 6. Pathway enrichment analysis based on 145 targets associated with the hallmarks of aging.
ID	Pathway	BgRatio [1]	p-value	p.adjust	q-value	Count [2]	Symbol
hsa05205	Proteoglycans in cancer	205/8114	4.53789e-19	1.02103e-16	3.53478e-17	27	MAPK14/EGFR/AKT1/ESR1/FGF2/MTOR/HGF/IGF1/IGF1R/IGF2/ITGAV/ITGB5/KDR/RHOA/MMP2/MMP9/MAPK1/PTK2/ROCK1/SRC/TGFB1/TLR2/TLR4/TNF/VEGFA/FZD8/CASP3
hsa05417	Lipid and atherosclerosis	215/8114	1.60461e-18	1.80519e-16	6.24955e-17	27	CHUK/MIB2/MAPK14/AKT1/GSK3B/HSPA5/IKBKB/IL1B/IL6/JAK2/RHOA/LYN/MMP1/MMP9/MAPK1/MAPK8/PTK2/SOD2/SRC/TLR2/TLR4/TNF/TRAF6/CASP1/CASP3/CASP8/CD36
hsa05152	Tuberculosis	180/8114	5.1931e-16	3.89482e-14	1.34838e-14	23	MAPK14/EP300/AKT1/IL1B/IL6/ITGAM/ITGB2/JAK1/JAK2/RHOA/MAPK1/MAPK8/RAB5C/SRC/TGFB1/TLR2/TLR4/TNF/TRAF6/VDR/RAB7A/CASP3/CASP8
hsa01521	EGFR tyrosine kinase inhibitor resistance	79/8114	1.23904e-14	6.9696e-13	2.41287e-13	16	EGFR/AKT1/FGF2/MTOR/GSK3B/HGF/IGF1/IGF1R/IL6/JAK1/JAK2/KDR/MAPK1/PTEN/SRC/VEGFA
hsa04068	FOXO signaling pathway	131/8114	2.18833e-14	9.84747e-13	3.40918e-13	19	CHUK/MAPK14/EGFR/EP300/AKT1/SIRT1/IGF1/IGF1R/IKBKB/IL6/INSR/PRKAG1/MAPK1/MAPK8/PTEN/SOD2/TGFB1/TGFBR2/CAT
hsa04151	PI3K-AKT signaling pathway	354/8114	6.53435e-14	2.45038e-12	8.48319e-13	28	CHUK/EGFR/AKT1/FGF2/ITGA11/MTOR/GSK3B/HGF/IGF1/IGF1R/IGF2/IKBKB/IL6/INSR/ITGAV/ITGB5/JAK1/JAK2/KDR/KIT/NGF/MAPK1/PTEN/PTK2/SPP1/TLR2/TLR4/VEGFA
hsa05161	Hepatitis B	162/8114	1.00392e-13	3.22688e-12	1.11714e-12	20	CHUK/MAPK14/EP300/AKT1/IKBKB/IL6/JAK1/JAK2/MMP9/MAPK1/MAPK8/SRC/TGFB1/TGFBR2/TLR2/TLR4/TNF/TRAF6/CASP3/CASP8
hsa04010	MAPK signaling pathway	294/8114	3.53836e-13	9.95163e-12	3.44524e-12	25	CHUK/MAPK14/DUSP3/EGFR/AKT1/FGF2/HGF/IGF1/IGF1R/IGF2/IKBKB/IL1B/INSR/KDR/KIT/NGF/PPM1A/MAPK1/MAPK8/TGFB1/TGFBR2/TNF/TRAF6/VEGFA/CASP3
hsa05135	Yersinia infection	137/8114	6.50269e-13	1.5037e-11	5.20579e-12	18	CHUK/MAPK14/AKT1/GSK3B/IKBKB/IL1B/IL6/RHOA/MAPK1/MAPK8/PTK2/ROCK1/SRC/TLR4/TNF/TRAF6/CASP1/PIP5K1A
hsa05163	Human cytomegalovirus infection	225/8114	6.68311e-13	1.5037e-11	5.20579e-12	22	CHUK/MAPK14/EGFR/AKT1/MTOR/GSK3B/IKBKB/IL1B/IL6/ITGAV/JAK1/RHOA/MAPK1/PTK2/ROCK1/CXCL12/SRC/TNF/VEGFA/CXCR4/CASP3/CASP8
hsa04510	Focal adhesion	201/8114	6.091e-12	1.24589e-10	4.31324e-11	20	EGFR/AKT1/ITGA11/GSK3B/HGF/IGF1/IGF1R/ITGAV/ITGB5/KDR/RHOA/MAPK1/MAPK8/PTEN/PTK2/ROCK1/SPP1/SRC/VEGFA/PIP5K1A
hsa05142	Chagas disease	102/8114	1.18984e-11	2.23094e-10	7.72349e-11	15	CHUK/MAPK14/AKT1/IKBKB/IL1B/IL6/MAPK1/MAPK8/TGFB1/TGFBR2/TLR2/TLR4/TNF/TRAF6/CASP8
hsa04936	Alcoholic liver disease	142/8114	1.39247e-11	2.41004e-10	8.34355e-11	17	CHUK/MAPK14/AKT1/SIRT1/GSK3B/IKBKB/IL1B/IL6/PPARA/PRKAG1/MAPK8/TLR4/TNF/TRAF6/CASP3/CASP8/LPIN2
hsa05167	Kaposi sarcoma-associated herpesvirus infection	194/8114	2.88279e-11	4.63305e-10	1.60396e-10	19	CHUK/MAPK14/EP300/AKT1/FGF2/MTOR/GSK3B/HCK/IKBKB/IL6/JAK1/JAK2/LYN/MAPK1/MAPK8/SRC/VEGFA/CASP3/CASP8
hsa05133	Pertussis	76/8114	4.22058e-11	6.33087e-10	2.19174e-10	13	MAPK14/IL1B/IL6/ITGAM/ITGB2/RHOA/MAPK1/MAPK8/TLR4/TNF/TRAF6/CASP1/CASP3
hsa05145	Toxoplasmosis	112/8114	4.75118e-11	6.68135e-10	2.31308e-10	15	CHUK/MAPK14/AKT1/IKBKB/JAK1/JAK2/MAPK1/MAPK8/TGFB1/TLR2/TLR4/TNF/TRAF6/CASP3/CASP8
hsa04657	IL-17 signaling pathway	94/8114	5.05875e-11	6.69541e-10	2.31794e-10	14	CHUK/MAPK14/GSK3B/IKBKB/IL1B/IL6/MMP1/MMP9/MAPK1/MAPK8/TNF/TRAF6/CASP3/CASP8
hsa01522	Endocrine resistance	98/8114	9.02692e-11	1.12836e-09	3.90639e-10	14	MAPK14/EGFR/AKT1/ESR1/MTOR/IGF1/IGF1R/MMP2/MMP9/NOTCH1/MAPK1/MAPK8/PTK2/SRC
hsa04620	Toll-like receptor signaling pathway	104/8114	2.04713e-10	2.42424e-09	8.39267e-10	14	CHUK/MAPK14/AKT1/IKBKB/IL1B/IL6/MAPK1/MAPK8/SPP1/TLR2/TLR4/TNF/TRAF6/CASP8
hsa05165	Human papillomavirus infection	331/8114	2.22306e-10	2.50095e-09	8.65825e-10	23	CHUK/CSNK1A1/EGFR/EP300/AKT1/ITGA11/MTOR/GSK3B/HDAC1/IKBKB/ITGAV/ITGB5/JAK1/NOTCH1/MAPK1/PTEN/PTK2/SPP1/TNF/VEGFA/FZD8/CASP3/CASP8
hsa05130	Pathogenic Escherichia coli infection	197/8114	3.19522e-10	3.39837e-09	1.17651e-09	18	CHUK/MAPK14/ABL1/IKBKB/IL1B/IL6/RHOA/MYO1C/MAPK1/MAPK8/ROCK1/SRC/TLR4/TNF/TRAF6/CASP1/CASP3/CASP8
hsa05235	PD-L1 expression and PD-1 checkpoint pathway in cancer	89/8114	3.32285e-10	3.39837e-09	1.17651e-09	13	CHUK/MAPK14/EGFR/AKT1/MTOR/IKBKB/JAK1/JAK2/MAPK1/PTEN/TLR2/TLR4/TRAF6
hsa04014	Ras signaling pathway	232/8114	6.43252e-10	6.29268e-09	2.17852e-09	19	CHUK/EGFR/AKT1/FGF2/ABL1/HGF/IGF1/IGF1R/IGF2/IKBKB/INSR/KDR/KIT/RHOA/NGF/MAPK1/MAPK8/RAB5C/VEGFA
hsa05140	Leishmaniasis	77/8114	7.63116e-10	7.15421e-09	2.47678e-09	12	MAPK14/IL1B/ITGAM/ITGB2/JAK1/JAK2/MAPK1/TGFB1/TLR2/TLR4/TNF/TRAF6
hsa05215	Prostate cancer	97/8114	1.00039e-09	9.00354e-09	3.11702e-09	13	CHUK/EGFR/EP300/AKT1/MTOR/GSK3B/IGF1/IGF1R/IKBKB/AR/MMP9/MAPK1/PTEN
hsa05418	Fluid shear stress and atherosclerosis	139/8114	1.06984e-09	9.25826e-09	3.2052e-09	15	CHUK/MAPK14/AKT1/IKBKB/IL1B/ITGAV/KDR/RHOA/MMP2/MMP9/MAPK8/PTK2/SRC/TNF/VEGFA
hsa04933	AGE-RAGE signaling pathway in diabetic complications	100/8114	1.47199e-09	1.22666e-08	4.24668e-09	13	MAPK14/AKT1/IL1B/IL6/JAK2/MMP2/MAPK1/MAPK8/TGFB1/TGFBR2/TNF/VEGFA/CASP3
hsa05131	Shigellosis	247/8114	1.85813e-09	1.46649e-08	5.07696e-09	19	CHUK/MAPK14/EGFR/AKT1/MTOR/GSK3B/IKBKB/IL1B/RHOA/MAPK1/MAPK8/PTK2/RRAGD/ROCK1/SRC/TLR4/TNF/TRAF6/CASP1
hsa05146	Amoebiasis	102/8114	1.89014e-09	1.46649e-08	5.07696e-09	13	RAB7B/IL1B/IL6/ITGAM/ITGB2/PTK2/RAB5C/TGFB1/TLR2/TLR4/TNF/RAB7A/CASP3
hsa05132	Salmonella infection	249/8114	2.12774e-09	1.59581e-08	5.52466e-09	19	CHUK/MAPK14/AKT1/RAB7B/IKBKB/IL1B/IL6/RHOA/MAPK1/MAPK8/RAB5C/TLR2/TLR4/TNF/TRAF6/RAB7A/CASP1/CASP3/CASP8
hsa04625	C-type lectin receptor signaling pathway	104/8114	2.41334e-09	1.75162e-08	6.06407e-09	13	CHUK/MAPK14/AKT1/IKBKB/IL1B/IL6/RHOA/MAPK1/MAPK8/SRC/TNF/CASP1/CASP8
hsa04150	mTOR signaling pathway	156/8114	5.3804e-09	3.78309e-08	1.3097e-08	15	CHUK/AKT1/MTOR/GSK3B/IGF1/IGF1R/IKBKB/INSR/RHOA/MAPK1/PTEN/RRAGD/TNF/FZD8/LPIN2
hsa05134	Legionellosis	57/8114	6.44089e-09	4.39152e-08	1.52034e-08	10	IL1B/IL6/ITGAM/ITGB2/TLR2/TLR4/TNF/CASP1/CASP3/CASP8
hsa04015	Rap1 signaling pathway	210/8114	6.69902e-09	4.43317e-08	1.53476e-08	17	MAPK14/EGFR/AKT1/FGF2/HGF/IGF1/IGF1R/INSR/ITGAM/ITGB2/KDR/KIT/RHOA/NGF/MAPK1/SRC/VEGFA
hsa04621	NOD-like receptor signaling pathway	184/8114	6.93891e-09	4.46073e-08	1.5443e-08	16	CHUK/NEK7/MAPK14/IKBKB/IL1B/IL6/JAK1/RHOA/MAPK1/MAPK8/TLR4/TNF/TRAF6/BRCC3/CASP1/CASP8
hsa05212	Pancreatic cancer	76/8114	9.07736e-09	5.67335e-08	1.96411e-08	11	CHUK/EGFR/AKT1/MTOR/IKBKB/JAK1/MAPK1/MAPK8/TGFB1/TGFBR2/VEGFA
hsa04213	Longevity regulating pathway - multiple species	62/8114	1.50969e-08	9.18054e-08	3.17829e-08	10	AKT1/SIRT1/MTOR/HDAC1/IGF1/IGF1R/INSR/PRKAG1/SOD2/CAT
hsa05224	Breast cancer	147/8114	2.04581e-08	1.21133e-07	4.19362e-08	14	CSNK1A1/EGFR/AKT1/ESR1/FGF2/MTOR/GSK3B/IGF1/IGF1R/KIT/NOTCH1/MAPK1/PTEN/FZD8
hsa05144	Malaria	50/8114	3.01724e-08	1.74072e-07	6.02634e-08	9	HGF/IL1B/IL6/ITGB2/TGFB1/TLR2/TLR4/TNF/CD36
hsa04659	Th17 cell differentiation	108/8114	3.9831e-08	2.16253e-07	7.48665e-08	12	CHUK/MAPK14/MTOR/IKBKB/IL1B/IL6/JAK1/JAK2/MAPK1/MAPK8/TGFB1/TGFBR2
hsa04931	Insulin resistance	108/8114	3.9831e-08	2.16253e-07	7.48665e-08	12	AKT1/MTOR/GSK3B/IKBKB/IL6/INSR/PPARA/PRKAG1/MAPK8/PTEN/TNF/CD36
hsa04932	Non-alcoholic fatty liver disease	155/8114	4.03672e-08	2.16253e-07	7.48665e-08	14	MAPK14/AKT1/GSK3B/IKBKB/IL1B/IL6/INSR/PPARA/PRKAG1/MAPK8/TGFB1/TNF/CASP3/CASP8
hsa04920	Adipocytokine signaling pathway	69/8114	4.38733e-08	2.26132e-07	7.82865e-08	10	CHUK/AKT1/MTOR/IKBKB/JAK2/PPARA/PRKAG1/MAPK8/TNF/CD36
hsa04066	HIF-1 signaling pathway	109/8114	4.42213e-08	2.26132e-07	7.82865e-08	12	EGFR/EP300/AKT1/MTOR/IGF1/IGF1R/IL6/INSR/EGLN1/MAPK1/TLR4/VEGFA
hsa04668	TNF signaling pathway	112/8114	6.0113e-08	3.00565e-07	1.04055e-07	12	CHUK/MAPK14/AKT1/IKBKB/IL1B/IL6/MMP9/MAPK1/MAPK8/TNF/CASP3/CASP8
hsa05162	Measles	139/8114	8.42186e-08	4.11939e-07	1.42613e-07	13	CHUK/AKT1/GSK3B/IKBKB/IL1B/IL6/JAK1/MAPK8/TLR2/TLR4/TRAF6/CASP3/CASP8
hsa04062	Chemokine signaling pathway	192/8114	8.99459e-08	4.30592e-07	1.49071e-07	15	CHUK/AKT1/GSK3B/HCK/IKBKB/ITK/JAK2/RHOA/LYN/MAPK1/PTK2/ROCK1/CXCL12/SRC/CXCR4
hsa05164	Influenza A	171/8114	1.3962e-07	6.54468e-07	2.26576e-07	14	CHUK/EP300/AKT1/IKBKB/IL1B/IL6/JAK1/JAK2/MAPK1/TLR4/TNF/CASP1/CASP3/CASP8
hsa05169	Epstein-Barr virus infection	202/8114	1.75764e-07	8.07081e-07	2.7941e-07	15	PSMD14/CHUK/MAPK14/AKT1/HDAC1/IKBKB/IL6/JAK1/LYN/MAPK8/TLR2/TNF/TRAF6/CASP3/CASP8
hsa05171	Coronavirus disease - COVID-19	232/8114	1.83776e-07	8.26993e-07	2.86304e-07	16	CHUK/MAPK14/EGFR/IKBKB/IL1B/IL6/JAK1/MMP1/MAPK1/MAPK8/ADAM17/TLR2/TLR4/TNF/TRAF6/CASP1
hsa04380	Osteoclast differentiation	128/8114	2.66153e-07	1.17421e-06	4.06509e-07	12	CHUK/MAPK14/AKT1/IKBKB/IL1B/JAK1/MAPK1/MAPK8/TGFB1/TGFBR2/TNF/TRAF6
hsa04926	Relaxin signaling pathway	129/8114	2.89927e-07	1.25449e-06	4.34303e-07	12	MAPK14/EGFR/AKT1/MMP1/MMP2/MMP9/MAPK1/MAPK8/SRC/TGFB1/TGFBR2/VEGFA
hsa05170	Human immunodeficiency virus 1 infection	212/8114	3.3012e-07	1.40145e-06	4.85181e-07	15	CHUK/MAPK14/AKT1/MTOR/IKBKB/MAPK1/MAPK8/PTK2/TLR2/TLR4/TNF/TRAF6/CXCR4/CASP3/CASP8
hsa05210	Colorectal cancer	86/8114	3.72059e-07	1.55025e-06	5.36693e-07	10	EGFR/AKT1/MTOR/GSK3B/RHOA/MAPK1/MAPK8/TGFB1/TGFBR2/CASP3
hsa04810	Regulation of actin cytoskeleton	218/8114	4.73531e-07	1.93717e-06	6.70647e-07	15	EGFR/FGF2/ITGA11/ITGAM/ITGAV/ITGB2/ITGB5/RHOA/MAPK1/PTK2/ROCK1/CXCL12/SRC/CXCR4/PIP5K1A
hsa05120	Epithelial cell signaling in Helicobacter pylori infection	70/8114	6.15407e-07	2.47262e-06	8.56018e-07	9	CHUK/MAPK14/EGFR/IKBKB/LYN/MAPK8/SRC/ADAM17/CASP3
hsa05208	Chemical carcinogenesis - reactive oxygen species	223/8114	6.33668e-07	2.49945e-06	8.65307e-07	15	CHUK/MAPK14/EGFR/AKT1/ABL1/HGF/IKBKB/MAPK1/MAPK8/PTEN/PTK2/SOD2/SRC/VEGFA/CAT
hsa04670	Leukocyte transendothelial migration	114/8114	6.44303e-07	2.49945e-06	8.65307e-07	11	MAPK14/ITGAM/ITGB2/ITK/RHOA/MMP2/MMP9/PTK2/ROCK1/CXCL12/CXCR4
hsa04140	Autophagy - animal	141/8114	7.63694e-07	2.87748e-06	9.9618e-07	12	AKT1/MTOR/RAB7B/IGF1R/MAPK1/MAPK8/PTEN/RRAGD/TRAF6/RAB7A/RAB33B/MTMR4
hsa05225	Hepatocellular carcinoma	168/8114	7.72247e-07	2.87748e-06	9.9618e-07	13	CSNK1A1/EGFR/AKT1/MTOR/GSK3B/HGF/IGF1R/IGF2/MAPK1/PTEN/TGFB1/TGFBR2/FZD8
hsa05323	Rheumatoid arthritis	93/8114	7.80117e-07	2.87748e-06	9.9618e-07	10	IL1B/IL6/ITGB2/MMP1/CXCL12/TGFB1/TLR2/TLR4/TNF/VEGFA
hsa05415	Diabetic cardiomyopathy	203/8114	1.14489e-06	4.15486e-06	1.43841e-06	14	PARP1/MAPK14/AKT1/MTOR/GSK3B/INSR/MMP2/MMP9/PPARA/MAPK8/PTEN/TGFB1/TGFBR2/CD36
hsa05219	Bladder cancer	41/8114	1.62209e-06	5.79317e-06	2.00559e-06	7	EGFR/MMP1/MMP2/MMP9/MAPK1/SRC/VEGFA
hsa05206	MicroRNAs in cancer	310/8114	1.89481e-06	6.66146e-06	2.30619e-06	17	DNMT1/EGFR/EP300/EZH2/SIRT1/MTOR/ABL1/HDAC1/IKBKB/RHOA/MMP9/NOTCH1/MAPK1/PTEN/ROCK1/VEGFA/CASP3
hsa04660	T cell receptor signaling pathway	104/8114	2.20667e-06	7.63849e-06	2.64443e-06	10	CHUK/MAPK14/AKT1/GSK3B/IKBKB/ITK/RHOA/MAPK1/MAPK8/TNF
hsa05160	Hepatitis C	157/8114	2.404e-06	8.19546e-06	2.83726e-06	12	CHUK/EGFR/AKT1/GSK3B/IKBKB/JAK1/PPARA/MAPK1/TNF/TRAF6/CASP3/CASP8
hsa04613	Neutrophil extracellular trap formation	190/8114	3.10182e-06	1.04166e-05	3.6062e-06	13	HDAC6/MAPK14/AKT1/MTOR/HDAC1/ITGAM/ITGB2/MAPK1/SRC/TLR2/TLR4/CASP1/HDAC9
hsa04012	ErbB signaling pathway	85/8114	3.25201e-06	1.07603e-05	3.72521e-06	9	EGFR/AKT1/MTOR/ABL1/GSK3B/MAPK1/MAPK8/PTK2/SRC
hsa05166	Human T-cell leukemia virus 1 infection	222/8114	3.31601e-06	1.08131e-05	3.74347e-06	14	CHUK/EP300/AKT1/IKBKB/IL6/ITGB2/JAK1/MMP7/MAPK1/MAPK8/PTEN/TGFB1/TGFBR2/TNF
hsa04211	Longevity regulating pathway	89/8114	4.78428e-06	1.5378e-05	5.32386e-06	9	AKT1/SIRT1/MTOR/IGF1/IGF1R/INSR/PRKAG1/SOD2/CAT
hsa04550	Signaling pathways regulating pluripotency of stem cells	143/8114	6.08915e-06	1.92966e-05	6.68046e-06	11	MAPK14/AKT1/FGF2/GSK3B/IGF1/IGF1R/JAK1/JAK2/MAPK1/KAT6A/FZD8
hsa04622	RIG-I-like receptor signaling pathway	70/8114	6.58506e-06	2.02964e-05	7.02659e-06	8	CHUK/MAPK14/IKBKB/RNF125/MAPK8/TNF/TRAF6/CASP8
hsa04917	Prolactin signaling pathway	70/8114	6.58506e-06	2.02964e-05	7.02659e-06	8	MAPK14/AKT1/ESR1/GSK3B/JAK2/MAPK1/MAPK8/SRC
hsa04520	Adherens junction	71/8114	7.33283e-06	2.22181e-05	7.69187e-06	8	EGFR/EP300/IGF1R/INSR/RHOA/MAPK1/SRC/TGFBR2
hsa04722	Neurotrophin signaling pathway	119/8114	7.50477e-06	2.22181e-05	7.69187e-06	10	MAPK14/AKT1/ABL1/GSK3B/IKBKB/RHOA/NGF/MAPK1/MAPK8/TRAF6
hsa04935	Growth hormone synthesis, secretion and action	119/8114	7.50477e-06	2.22181e-05	7.69187e-06	10	MAPK14/EP300/AKT1/MTOR/GSK3B/IGF1/JAK2/MAPK1/MAPK8/PTK2
hsa05218	Melanoma	72/8114	8.15116e-06	2.38183e-05	8.24587e-06	8	EGFR/AKT1/FGF2/HGF/IGF1/IGF1R/MAPK1/PTEN
hsa04919	Thyroid hormone signaling pathway	121/8114	8.71165e-06	2.51298e-05	8.69989e-06	10	EP300/AKT1/ESR1/MTOR/GSK3B/HDAC1/ITGAV/NOTCH1/MAPK1/SRC
hsa05226	Gastric cancer	149/8114	9.04627e-06	2.57647e-05	8.91971e-06	11	CSNK1A1/EGFR/AKT1/FGF2/MTOR/GSK3B/HGF/MAPK1/TGFB1/TGFBR2/FZD8
hsa05220	Chronic myeloid leukemia	76/8114	1.22403e-05	3.44258e-05	1.19182e-05	8	CHUK/AKT1/ABL1/HDAC1/IKBKB/MAPK1/TGFB1/TGFBR2
hsa04064	NF-kappa B signaling pathway	104/8114	1.72627e-05	4.79521e-05	1.6601e-05	9	CHUK/PARP1/IKBKB/IL1B/LYN/CXCL12/TLR4/TNF/TRAF6
hsa04370	VEGF signaling pathway	59/8114	1.98694e-05	5.45198e-05	1.88747e-05	7	MAPK14/AKT1/KDR/MAPK1/PTK2/SRC/VEGFA
hsa04210	Apoptosis	136/8114	2.44194e-05	6.61971e-05	2.29173e-05	10	CHUK/PARP1/AKT1/IKBKB/NGF/MAPK1/MAPK8/TNF/CASP3/CASP8
hsa05010	Alzheimer disease	384/8114	3.23582e-05	8.66738e-05	3.00064e-05	17	PSMD14/CHUK/CSNK1A1/AKT1/MTOR/GSK3B/IKBKB/IL1B/IL6/INSR/MAPK1/MAPK8/ADAM17/TNF/FZD8/CASP3/CASP8
hsa05410	Hypertrophic cardiomyopathy	90/8114	4.25519e-05	0.000112637	3.8995e-05	8	ITGA11/IGF1/IL6/ITGAV/ITGB5/PRKAG1/TGFB1/TNF
hsa05221	Acute myeloid leukemia	67/8114	4.60584e-05	0.000119601	4.14057e-05	7	CHUK/AKT1/MTOR/IKBKB/ITGAM/KIT/MAPK1
hsa04930	Type II diabetes mellitus	46/8114	4.62456e-05	0.000119601	4.14057e-05	6	MTOR/IKBKB/INSR/MAPK1/MAPK8/TNF
hsa04658	Th1 and Th2 cell differentiation	92/8114	4.98879e-05	0.000126121	4.3663e-05	8	CHUK/MAPK14/IKBKB/JAK1/JAK2/NOTCH1/MAPK1/MAPK8
hsa05222	Small cell lung cancer	92/8114	4.98879e-05	0.000126121	4.3663e-05	8	CHUK/AKT1/IKBKB/ITGAV/PTEN/PTK2/TRAF6/CASP3
hsa05207	Chemical carcinogenesis - receptor activation	212/8114	5.08989e-05	0.000127247	4.40528e-05	12	EGFR/AKT1/ESR1/FGF2/MTOR/AR/JAK2/PPARA/MAPK1/SRC/VDR/VEGFA
hsa04152	AMPK signaling pathway	120/8114	5.41941e-05	0.000133997	4.63894e-05	9	AKT1/SIRT1/MTOR/IGF1/IGF1R/INSR/RAB14/PRKAG1/CD36
hsa05211	Renal cell carcinoma	69/8114	5.57998e-05	0.000136467	4.72447e-05	7	EP300/AKT1/HGF/EGLN1/MAPK1/TGFB1/VEGFA
hsa04350	TGF-beta signaling pathway	94/8114	5.82498e-05	0.000140927	4.87887e-05	8	EP300/RHOA/MAPK1/ROCK1/BMP2/TGFB1/TGFBR2/TNF
hsa01523	Antifolate resistance	30/8114	6.11199e-05	0.000146298	5.06481e-05	5	CHUK/IKBKB/IL1B/IL6/TNF
hsa04145	Phagosome	152/8114	6.34955e-05	0.000150384	5.20628e-05	10	RAB7B/ITGAM/ITGAV/ITGB2/ITGB5/RAB5C/TLR2/TLR4/RAB7A/CD36
hsa05214	Glioma	75/8114	9.55983e-05	0.000224059	7.75688e-05	7	EGFR/AKT1/MTOR/IGF1/IGF1R/MAPK1/PTEN
hsa05203	Viral carcinogenesis	204/8114	0.000163538	0.000379341	0.000131327	11	HDAC6/EP300/HDAC1/JAK1/RHOA/LYN/MAPK1/SRC/CASP3/CASP8/HDAC9
hsa04144	Endocytosis	251/8114	0.00025323	0.000581396	0.000201279	12	RAB31/WWP1/EGFR/IGF1R/RHOA/RAB5C/SRC/TGFBR2/TRAF6/CXCR4/RAB7A/PIP5K1A
hsa04071	Sphingolipid signaling pathway	119/8114	0.000304369	0.000691747	0.000239482	8	MAPK14/AKT1/RHOA/MAPK1/MAPK8/PTEN/ROCK1/TNF
hsa05321	Inflammatory bowel disease	65/8114	0.00032644	0.00073449	0.00025428	6	IL1B/IL6/TGFB1/TLR2/TLR4/TNF
hsa04218	Cellular senescence	156/8114	0.000400803	0.000892878	0.000309113	9	MAPK14/AKT1/SIRT1/MTOR/IL6/MAPK1/PTEN/TGFB1/TGFBR2
hsa04664	Fc epsilon RI signaling pathway	68/8114	0.000417665	0.00092132	0.00031896	6	MAPK14/AKT1/LYN/MAPK1/MAPK8/TNF
hsa04217	Necroptosis	159/8114	0.000461004	0.00100705	0.000348639	9	PARP1/IL1B/JAK1/JAK2/MAPK8/TLR4/TNF/CASP1/CASP8
hsa05230	Central carbon metabolism in cancer	70/8114	0.000488772	0.00105744	0.000366084	6	EGFR/AKT1/MTOR/KIT/MAPK1/PTEN
hsa04137	Mitophagy - animal	72/8114	0.000568977	0.00121924	0.000422098	6	RAB7B/RHOT1/MAPK8/SRC/RAB7A/RHOT2
hsa04910	Insulin signaling pathway	137/8114	0.000782509	0.00166099	0.000575032	8	AKT1/MTOR/GSK3B/IKBKB/INSR/PRKAG1/MAPK1/MAPK8
hsa04662	B cell receptor signaling pathway	82/8114	0.00113477	0.0023862	0.000826098	6	CHUK/AKT1/GSK3B/IKBKB/LYN/MAPK1
hsa04360	Axon guidance	182/8114	0.00121567	0.00253264	0.000876797	9	ABL1/GSK3B/RHOA/MAPK1/PTK2/ROCK1/CXCL12/SRC/CXCR4
hsa04072	Phospholipase D signaling pathway	148/8114	0.0012934	0.00266986	0.000924304	8	EGFR/AKT1/MTOR/INSR/KIT/RHOA/MAPK1/PIP5K1A
hsa05213	Endometrial cancer	58/8114	0.00142555	0.0029159	0.00100948	5	EGFR/AKT1/GSK3B/MAPK1/PTEN
hsa05020	Prion disease	273/8114	0.00187923	0.00380925	0.00131876	11	PSMD14/MAPK14/GSK3B/HSPA5/IL1B/IL6/NOTCH1/MAPK1/MAPK8/TNF/CASP3
hsa04611	Platelet activation	124/8114	0.00203097	0.00408007	0.00141251	7	MAPK14/AKT1/RHOA/LYN/MAPK1/ROCK1/SRC
hsa04623	Cytosolic DNA-sensing pathway	63/8114	0.00206546	0.00411263	0.00142379	5	CHUK/IKBKB/IL1B/IL6/CASP1
hsa04912	GnRH signaling pathway	93/8114	0.00217328	0.00428937	0.00148498	6	MAPK14/EGFR/MMP2/MAPK1/MAPK8/SRC
hsa05414	Dilated cardiomyopathy	96/8114	0.00255257	0.00499415	0.00172897	6	ITGA11/IGF1/ITGAV/ITGB5/TGFB1/TNF
hsa04750	Inflammatory mediator regulation of TRP channels	98/8114	0.00283174	0.00544565	0.00188528	6	MAPK14/IGF1/IL1B/NGF/MAPK8/SRC
hsa05231	Choline metabolism in cancer	98/8114	0.00283174	0.00544565	0.00188528	6	EGFR/AKT1/MTOR/MAPK1/MAPK8/PIP5K1A
hsa04640	Hematopoietic cell lineage	99/8114	0.00297962	0.00564185	0.0019532	6	IL1B/IL6/ITGAM/KIT/TNF/CD36
hsa04530	Tight junction	169/8114	0.00298391	0.00564185	0.0019532	8	RHOA/RAB8B/PRKAG1/MAPK8/RAP2C/RAB13/ROCK1/SRC
hsa05022	Pathways of neurodegeneration - multiple diseases	476/8114	0.00335056	0.0062823	0.00217492	15	PSMD14/MAPK14/CSNK1A1/MTOR/GSK3B/HSPA5/IL1B/IL6/MAPK1/MAPK8/TNF/FZD8/CASP3/CASP8/CAT
hsa04914	Progesterone-mediated oocyte maturation	102/8114	0.00345806	0.00643028	0.00222615	6	MAPK14/AKT1/IGF1/IGF1R/MAPK1/MAPK8
hsa04915	Estrogen signaling pathway	138/8114	0.00370712	0.0068369	0.00236693	7	EGFR/AKT1/ESR1/MMP2/MMP9/MAPK1/SRC
hsa04120	Ubiquitin mediated proteolysis	142/8114	0.00433908	0.00793735	0.0027479	7	UBE2E3/WWP1/UBE2O/TRAF6/UBE2M/UBE4A/CDC34
hsa04672	Intestinal immune network for IgA production	49/8114	0.0052786	0.0095781	0.00331593	4	IL6/CXCL12/TGFB1/CXCR4
hsa05202	Transcriptional misregulation in cancer	193/8114	0.00663259	0.0119387	0.00413315	8	HDAC1/IGF1/IGF1R/IL6/ITGAM/MMP9/PTK2/TGFBR2
hsa04512	ECM-receptor interaction	88/8114	0.0086651	0.0154734	0.00535687	5	ITGA11/ITGAV/ITGB5/SPP1/CD36
hsa04630	JAK-STAT signaling pathway	162/8114	0.00879487	0.0155815	0.00539428	7	EGFR/EP300/AKT1/MTOR/IL6/JAK1/JAK2
hsa04330	Notch signaling pathway	59/8114	0.0101592	0.017858	0.00618241	4	EP300/HDAC1/NOTCH1/ADAM17
hsa04310	Wnt signaling pathway	167/8114	0.0103026	0.0179696	0.00622106	7	CSNK1A1/EP300/GSK3B/RHOA/MMP7/MAPK8/FZD8
hsa04215	Apoptosis - multiple species	32/8114	0.0106904	0.0183515	0.00635328	3	MAPK8/CASP3/CASP8
hsa04730	Long-term depression	60/8114	0.0107662	0.0183515	0.00635328	4	IGF1/IGF1R/LYN/MAPK1
hsa05416	Viral myocarditis	60/8114	0.0107662	0.0183515	0.00635328	4	ABL1/ITGB2/CASP3/CASP8
hsa05168	Herpes simplex virus 1 infection	495/8114	0.0115215	0.0194912	0.00674783	14	CHUK/AKT1/MTOR/IKBKB/IL1B/IL6/JAK1/JAK2/SRC/TLR2/TNF/TRAF6/CASP3/CASP8
hsa00310	Lysine degradation	63/8114	0.0127264	0.021369	0.00739793	4	EZH2/SETD1B/PLOD1/PLOD3
hsa04666	Fc gamma R-mediated phagocytosis	97/8114	0.0128758	0.0214596	0.0074293	5	AKT1/HCK/LYN/MAPK1/PIP5K1A
hsa04916	Melanogenesis	101/8114	0.0151272	0.0250266	0.00866417	5	EP300/GSK3B/KIT/MAPK1/FZD8
hsa04960	Aldosterone-regulated sodium reabsorption	37/8114	0.0158995	0.0259231	0.00897456	3	IGF1/INSR/MAPK1
hsa05143	African trypanosomiasis	37/8114	0.0158995	0.0259231	0.00897456	3	IL1B/IL6/TNF
hsa04928	Parathyroid hormone synthesis, secretion and action	106/8114	0.0182943	0.0296131	0.010252	5	EGFR/RHOA/MAPK1/MMP25/VDR
hsa04922	Glucagon signaling pathway	107/8114	0.0189764	0.0304978	0.0105583	5	EP300/AKT1/SIRT1/PPARA/PRKAG1
hsa05223	Non-small cell lung cancer	72/8114	0.0199232	0.0317923	0.0110065	4	EGFR/AKT1/HGF/MAPK1
hsa01524	Platinum drug resistance	73/8114	0.0208498	0.0328057	0.0113573	4	AKT1/MAPK1/CASP3/CASP8
hsa04115	p53 signaling pathway	73/8114	0.0208498	0.0328057	0.0113573	4	IGF1/PTEN/CASP3/CASP8
hsa05332	Graft-versus-host disease	42/8114	0.0223066	0.034854	0.0120664	3	IL1B/IL6/TNF
hsa04921	Oxytocin signaling pathway	154/8114	0.0236614	0.0367159	0.012711	6	EGFR/RHOA/PRKAG1/MAPK1/ROCK1/SRC
hsa04390	Hippo signaling pathway	157/8114	0.0257165	0.0396317	0.0137204	6	GSK3B/ITGB2/BMP2/TGFB1/TGFBR2/FZD8
hsa04060	Cytokine-cytokine receptor interaction	295/8114	0.026367	0.0403576	0.0139718	9	IL1B/IL6/NGF/CXCL12/BMP2/TGFB1/TGFBR2/TNF/CXCR4
hsa04110	Cell cycle	126/8114	0.0352313	0.0535611	0.0185428	5	EP300/ABL1/GSK3B/HDAC1/TGFB1
hsa04913	Ovarian steroidogenesis	51/8114	0.036883	0.0556959	0.0192818	3	IGF1/IGF1R/INSR
hsa04024	cAMP signaling pathway	221/8114	0.0403006	0.0604509	0.020928	7	EP300/AKT1/RHOA/PPARA/MAPK1/MAPK8/ROCK1
hsa04114	Oocyte meiosis	131/8114	0.0406016	0.060499	0.0209447	5	MAPK14/IGF1/IGF1R/AR/MAPK1
hsa04371	Apelin signaling pathway	139/8114	0.0501798	0.0742793	0.0257154	5	AKT1/MTOR/PRKAG1/MAPK1/SPP1
hsa04061	Viral protein interaction with cytokine and cytokine receptor	100/8114	0.0560913	0.0824872	0.028557	4	IL6/CXCL12/TNF/CXCR4
hsa04020	Calcium signaling pathway	240/8114	0.0580851	0.0848646	0.02938	7	EGFR/FGF2/HGF/KDR/NGF/VEGFA/CXCR4
hsa05217	Basal cell carcinoma	63/8114	0.0622158	0.0903133	0.0312664	3	GSK3B/BMP2/FZD8
hsa04929	GnRH secretion	64/8114	0.0646153	0.0931951	0.032264	3	AKT1/MAPK1/SPP1
hsa05016	Huntington disease	306/8114	0.0741863	0.106318	0.0368072	8	PSMD14/EP300/MTOR/HDAC1/MAPK8/SOD2/CASP3/CASP8
hsa05014	Amyotrophic lateral sclerosis	364/8114	0.079313	0.112946	0.0391017	9	HDAC6/PSMD14/MAPK14/MTOR/HSPA5/TNF/CASP1/CASP3/CAT
hsa00562	Inositol phosphate metabolism	73/8114	0.0880537	0.124604	0.0431379	3	PTEN/PIP5K1A/MTMR4
hsa04022	cGMP-PKG signaling pathway	167/8114	0.0933167	0.130932	0.0453286	5	AKT1/INSR/RHOA/MAPK1/ROCK1
hsa03320	PPAR signaling pathway	75/8114	0.0936894	0.130932	0.0453286	3	MMP1/PPARA/CD36
hsa05100	Bacterial invasion of epithelial cells	77/8114	0.0994705	0.137306	0.0475352	3	RHOA/PTK2/SRC
hsa05412	Arrhythmogenic right ventricular cardiomyopathy	77/8114	0.0994705	0.137306	0.0475352	3	ITGA11/ITGAV/ITGB5
hsa04650	Natural killer cell mediated cytotoxicity	131/8114	0.120476	0.165287	0.057222	4	ITGB2/MAPK1/TNF/CASP3
hsa04728	Dopaminergic synapse	132/8114	0.122936	0.16764	0.0580369	4	MAPK14/AKT1/GSK3B/MAPK8
hsa04940	Type I diabetes mellitus	43/8114	0.127259	0.172489	0.0597155	2	IL1B/TNF
hsa04540	Gap junction	88/8114	0.133654	0.180073	0.062341	3	EGFR/MAPK1/SRC
hsa00514	Other types of O-glycan biosynthesis	47/8114	0.146941	0.196796	0.0681305	2	GALNT1/PLOD3
hsa05017	Spinocerebellar ataxia	143/8114	0.151371	0.20153	0.0697695	4	PSMD14/AKT1/MTOR/MAPK8
hsa04070	Phosphatidylinositol signaling system	97/8114	0.16422	0.21735	0.0752462	3	PTEN/PIP5K1A/MTMR4
hsa04961	Endocrine and other factor-regulated calcium reabsorption	53/8114	0.177498	0.23355	0.0808548	2	ESR1/VDR
hsa04934	Cushing syndrome	155/8114	0.184949	0.24194	0.0837592	4	EGFR/GSK3B/MAPK1/FZD8
hsa04340	Hedgehog signaling pathway	56/8114	0.193129	0.249736	0.0864583	2	CSNK1A1/GSK3B
hsa04923	Regulation of lipolysis in adipocytes	56/8114	0.193129	0.249736	0.0864583	2	AKT1/INSR
hsa04725	Cholinergic synapse	113/8114	0.222846	0.286516	0.0991915	3	AKT1/JAK2/MAPK1
hsa04720	Long-term potentiation	67/8114	0.251601	0.320796	0.111059	2	EP300/MAPK1
hsa00670	One carbon pool by folate	20/8114	0.252359	0.320796	0.111059	1	MTHFD2
hsa05031	Amphetamine addiction	69/8114	0.262329	0.331596	0.114798	2	SIRT1/HDAC1
hsa05034	Alcoholism	187/8114	0.283796	0.355398	0.123039	4	HDAC6/HDAC1/MAPK1/HDAC9
hsa03060	Protein export	23/8114	0.284319	0.355398	0.123039	1	HSPA5
hsa04270	Vascular smooth muscle contraction	134/8114	0.304652	0.378711	0.131109	3	RHOA/MAPK1/ROCK1
hsa04612	Antigen processing and presentation	78/8114	0.310533	0.3839	0.132906	2	HSPA5/TNF
hsa00983	Drug metabolism - other enzymes	80/8114	0.32118	0.394894	0.136712	2	NME7/IMPDH2
hsa04146	Peroxisome	82/8114	0.331789	0.40572	0.14046	2	SOD2/CAT
hsa04610	Complement and coagulation cascades	85/8114	0.347615	0.422775	0.146364	2	ITGAM/ITGB2
hsa00630	Glyoxylate and dicarboxylate metabolism	30/8114	0.353719	0.427886	0.148134	1	CAT
hsa04723	Retrograde endocannabinoid signaling	148/8114	0.360117	0.431133	0.149258	3	MAPK14/MAPK1/MAPK8
hsa04710	Circadian rhythm	31/8114	0.363073	0.431133	0.149258	1	PRKAG1
hsa05310	Asthma	31/8114	0.363073	0.431133	0.149258	1	TNF
hsa04514	Cell adhesion molecules	149/8114	0.364068	0.431133	0.149258	3	ITGAM/ITGAV/ITGB2
hsa04261	Adrenergic signaling in cardiomyocytes	150/8114	0.368015	0.433526	0.150086	3	MAPK14/AKT1/MAPK1
hsa04136	Autophagy - other	32/8114	0.372292	0.43628	0.15104	1	MTOR
hsa03410	Base excision repair	33/8114	0.381379	0.444613	0.153925	1	PARP1
hsa05150	Staphylococcus aureus infection	96/8114	0.404461	0.465836	0.161272	2	ITGAM/ITGB2
hsa00512	Mucin type O-glycan biosynthesis	36/8114	0.407865	0.465836	0.161272	1	GALNT1
hsa00760	Nicotinate and nicotinamide metabolism	36/8114	0.407865	0.465836	0.161272	1	SIRT1
hsa03030	DNA replication	36/8114	0.407865	0.465836	0.161272	1	POLA1
hsa05216	Thyroid cancer	37/8114	0.416442	0.473229	0.163831	1	MAPK1
hsa05330	Allograft rejection	38/8114	0.424895	0.480409	0.166317	1	TNF
hsa04141	Protein processing in endoplasmic reticulum	171/8114	0.44949	0.503208	0.17421	3	HSPA5/MAPK8/RNF5
hsa03440	Homologous recombination	41/8114	0.449533	0.503208	0.17421	1	BRCC3
hsa00380	Tryptophan metabolism	42/8114	0.457511	0.509603	0.176424	1	CAT
hsa04975	Fat digestion and absorption	43/8114	0.465374	0.515808	0.178572	1	CD36
hsa04962	Vasopressin-regulated water reabsorption	44/8114	0.473124	0.521828	0.180656	1	RAB5C
hsa03050	Proteasome	46/8114	0.488291	0.53593	0.185538	1	PSMD14
hsa04973	Carbohydrate digestion and absorption	47/8114	0.495712	0.539836	0.186891	1	AKT1
hsa04726	Serotonergic synapse	115/8114	0.496649	0.539836	0.186891	2	MAPK1/CASP3
hsa00270	Cysteine and methionine metabolism	50/8114	0.51734	0.556945	0.192814	1	DNMT1
hsa04979	Cholesterol metabolism	50/8114	0.51734	0.556945	0.192814	1	CD36
hsa05012	Parkinson disease	266/8114	0.537805	0.576219	0.199487	4	PSMD14/HSPA5/MAPK8/CASP3
hsa00230	Purine metabolism	127/8114	0.550082	0.58658	0.203073	2	NME7/IMPDH2
hsa00240	Pyrimidine metabolism	58/8114	0.570621	0.605612	0.209662	1	NME7
hsa04978	Mineral absorption	60/8114	0.583003	0.615849	0.213206	1	VDR
hsa00561	Glycerolipid metabolism	61/8114	0.589061	0.61934	0.214415	1	LPIN2
hsa01240	Biosynthesis of cofactors	153/8114	0.651835	0.682153	0.236161	2	MTHFD2/NME7
hsa04714	Thermogenesis	232/8114	0.655355	0.682662	0.236337	3	MAPK14/MTOR/PRKAG1
hsa04918	Thyroid hormone synthesis	75/8114	0.66525	0.689775	0.238799	1	HSPA5
hsa03018	RNA degradation	79/8114	0.68432	0.706294	0.244518	1	CNOT6L
hsa04727	GABAergic synapse	89/8114	0.727412	0.747341	0.258729	1	SRC
hsa04713	Circadian entrainment	97/8114	0.757642	0.774861	0.268256	1	MAPK1
hsa00564	Glycerophospholipid metabolism	98/8114	0.761179	0.774956	0.268289	1	LPIN2
hsa04972	Pancreatic secretion	102/8114	0.774822	0.785293	0.271867	1	RHOA
hsa04724	Glutamatergic synapse	114/8114	0.811285	0.817679	0.283079	1	MAPK1
hsa01200	Carbon metabolism	115/8114	0.814045	0.817679	0.283079	1	CAT
hsa05322	Systemic lupus erythematosus	136/8114	0.863587	0.863587	0.298973	1	TNF
[1] BgRatio refers to the number of annotated genes involved in the pathway / the total number of annotated genes in the database
[2] Number of annotated genes associated with hallmark(s) of aging involved in the pathway

## Sheet: Supplementary Table 7
Supplementary Table 7. List of AAD and NAAD datasets analyzed.
Aging/ Non-aging disease	Therapeutic area	Dataset	# Cases	# Controls	Tissue
Aging	Alzheimer's disease	GSE48350	19	43	Hippocampus
Aging	Alzheimer's disease	GSE36980	7	10	Hippocampus
Aging	Alzheimer's disease	GSE48350	25	43	Post-central gyrus
Aging	Alzheimer's disease	GSE48350	21	48	Superior frontal gyrus
Aging	Alzheimer's disease	GSE48350	15	39	Entorhinal cortex
Aging	Alzheimer's disease	GSE125583	219	70	Cerebral gyrus
Aging	Alzheimer's disease	GSE36980	15	18	Front cortex
Aging	Alzheimer's disease	GSE37263	8	8	Neocortex
Aging	Alzheimer's disease	GSE95587	84	33	Cerebral gyrus
Aging	Alzheimer's disease	GSE36980	10	19	Temporal cortex
Aging	Alzheimer's disease	GSE104704	12	10	Temporal lobe
Aging	Alzheimer's disease	GSE39420	7	7	Thalamus
Aging	Amytrophic lateral sclerosis	GSE122649	26	12	Motor cortex
Aging	Amytrophic lateral sclerosis	GSE76220	13	8	Motor neuron
Aging	Amytrophic lateral sclerosis	E-MTAB-1925	3	3	Motor cortex
Aging	Amytrophic lateral sclerosis	GSE20589	3	7	Motor neuron
Aging	Amytrophic lateral sclerosis	GSE19332	3	7	Motor neuron
Aging	Amytrophic lateral sclerosis	GSE67196	8	9	Frontal cortex
Aging	Amytrophic lateral sclerosis	GSE67196	8	8	Cerebellum
Aging	Amytrophic lateral sclerosis	GSE67196	10	9	Frontal cortex
Aging	Amytrophic lateral sclerosis	GSE67196	10	8	Cerebellum
Aging	Amytrophic lateral sclerosis	GSE68605	8	3	Motor neuron
Aging	Chronic kidney disease	GSE66494	53	8	Kidney
Aging	Chronic kidney disease	GSE96804	41	20	glomeruli
Aging	Chronic kidney disease	GSE162830	18	9	glomeruli
Aging	Chronic kidney disease	GSE142025	27	9	Kidney
Aging	Chronic kidney disease	GSE30529	10	12	kidney
Aging	Chronic kidney disease	GSE30528	9	13	kidney
Aging	Chronic kidney disease	GSE163603	6	60	kidney
Aging	Chronic obstructive pulmonary disease	GSE8581	16	19	Lung
Aging	Chronic obstructive pulmonary disease	GSE103174	37	16	Lung
Aging	Chronic obstructive pulmonary disease	GSE106986	14	5	Lung
Aging	Chronic obstructive pulmonary disease	GSE76925	111	40	Lung
Aging	Chronic obstructive pulmonary disease	GSE37768	18	20	Lung
Aging	Chronic obstructive pulmonary disease	GSE57148	98	91	Lung
Aging	Cirrhosis of liver	GSE77627	22	14	Liver
Aging	Cirrhosis of liver	GSE6764	3	10	Liver
Aging	Cirrhosis of liver	GSE89377	12	13	Liver
Aging	Cirrhosis of liver	GSE36411	21	21	Liver
Aging	Cirrhosis of liver	GSE45050	5	3	Liver
Aging	Idiopathic pulmonary fibrosis	GSE150910	103	103	Lung
Aging	Idiopathic pulmonary fibrosis	GSE138283	12	5	Lung
Aging	Idiopathic pulmonary fibrosis	GSE101286	7	3	Lung
Aging	Idiopathic pulmonary fibrosis	GSE72073	5	3	Lung
Aging	Idiopathic pulmonary fibrosis	GSE92592	20	19	Lung
Aging	Idiopathic pulmonary fibrosis	GSE52463	8	7	Lung
Aging	Idiopathic pulmonary fibrosis	GSE83717	6	5	Lung
Aging	Idiopathic pulmonary fibrosis	GSE21369	11	6	Lung
Aging	Idiopathic pulmonary fibrosis	GSE15197	8	13	Lung
Aging	Idiopathic pulmonary fibrosis	GSE99621	18	8	Lung
Aging	Idiopathic pulmonary fibrosis	GSE24206	17	6	Lung
Aging	Obesity	GSE151839	10	10	Fat
Aging	Obesity	GSE92405	26	26	Subcutaneous adipose
Aging	Obesity	GSE133786	6	5	Visceral fat tissue
Aging	Obesity	GSE55008	3	4	Omental adipose
Aging	Obesity	GSE55200	8	7	Subcutaneous adipose
Aging	Obesity	GSE152991	14	11	Subcutaneous adipose
Aging	Obesity	GSE26637	5	5	Subcutaneous adipose
Aging	Obesity	GSE9624	5	6	Omental adipose
Aging	Obesity	E-MEXP-1425	14	13	Adipose tissue
Aging	Obesity	GSE125856	5	5	Subcutaneous adipose
Aging	Osteoarthritis	GSE89408	22	28	Joint synovial biopsies
Aging	Osteoarthritis	GSE82107	10	7	Synovial biopsies
Aging	Osteoarthritis	GSE55457	10	10	Synovial membrane
Aging	Osteoarthritis	GSE12021	10	9	Synovial membrane
Aging	Osteoarthritis	GSE55235	10	10	Synovial tissue
Aging	Osteoporosis	GSE35956	5	5	Mesenchymal stem cells from bone marrow
Aging	Osteoporosis	GSE35958	5	4	Mesenchymal stem cells from bone marrow
Aging	Parkinson's disease	GSE6613	50	22	Blood
Aging	Parkinson's disease	GSE18838	17	11	Blood
Aging	Parkinson's disease	GSE72267	40	19	Blood
Aging	Parkinson's disease	GSE99039	205	233	Blood
Aging	Primary myelofibrosis	GSE61629	4	21	Blood
Aging	Primary myelofibrosis	GSE26049	18	42	Blood
Aging	Pulmonary arterial hypertension	GSE703	14	6	Blood
Aging	Pulmonary arterial hypertension	GSE131793	10	10	Blood
Aging	Pulmonary arterial hypertension	GSE22356	18	10	Blood
Aging	Pulmonary arterial hypertension	GSE33463	72	41	Blood
Aging	Pulmonary arterial hypertension	GSE38267	13	28	Blood
Aging	Rheumatoid arthritis	GSE90081	12	12	Blood
Aging	Rheumatoid arthritis	GSE93272	232	43	Blood
Aging	Rheumatoid arthritis	GSE100191	7	5	Blood
Aging	Rheumatoid arthritis	GSE120178	125	20	Blood
Aging	Type 2 diabetes mellitus	GSE64998	7	14	Liver
Aging	Type 2 diabetes mellitus	GSE23343	10	7	Liver
Aging	Type 2 diabetes mellitus	GSE121344	4	8	Liver
Aging	Type 2 diabetes mellitus	GSE15653	9	9	Liver
Non-aging	Acromegaly	GSE4488	9	7	Blood
Non-aging	Acromegaly	GSE6351	4	6	Blood
Non-aging	Asthma	GSE43696	88	20	Bronchial epithelial cells
Non-aging	Asthma	GSE104468	12	12	Bronchial epithelia
Non-aging	Asthma	GSE15823	4	4	Bronchial biopsies
Non-aging	Asthma	GSE41649	4	4	Bronchial biopsies
Non-aging	Asthma	GSE67472	62	43	Airway epithelium
Non-aging	Asthma	GSE85567	57	28	Airway epithelial cells
Non-aging	Asthma	GSE64913	11	20	Central airway epithelium
Non-aging	Asthma	GSE4302	42	28	Airway epithelial brushing
Non-aging	Asthma	GSE109484	33	14	Airway epithelium
Non-aging	Asthma	GSE41861	51	30	Bronchial epithelium
Non-aging	Asthma	GSE63142	128	27	Bronchial epithelial cells
Non-aging	Asthma	GSE106388	30	8	Bronchial epithelial cells
Non-aging	Asthma	GSE89809	38	18	Bronchial epithelium
Non-aging	Celiac disease	GSE164883	26	22	Gut
Non-aging	Celiac disease	GSE72625	10	17	Duodenal biopsy
Non-aging	Celiac disease	GSE134900	51	44	Duodenum
Non-aging	Crohn's disease	GSE9686	11	8	Colon
Non-aging	Crohn's disease	GSE126124	37	19	Colon
Non-aging	Crohn's disease	GSE59071	8	11	Colon
Non-aging	Crohn's disease	GSE10616	14	11	Colon
Non-aging	Crohn's disease	GSE83687	12	47	Colon
Non-aging	Crohn's disease	GSE95437	23	29	Colon
Non-aging	Crohn's disease	GSE75214	8	11	Colon
Non-aging	Crohn's disease	GSE16879	19	6	Colon
Non-aging	Cystic fibrosis	GSE136371	33	16	Blood
Non-aging	Cystic fibrosis	GSE124548	40	20	Blood
Non-aging	Cystic fibrosis	GSE107846	28	12	Blood
Non-aging	Cystic fibrosis	GSE71010	15	43	Neutrophils
Non-aging	Cystic fibrosis	GSE38267	23	28	Blood
Non-aging	Hepatitis C virus infection	GSE40184	10	8	Blood
Non-aging	Hepatitis C virus infection	GSE40223	5	5	Blood
Non-aging	Hepatitis, alcoholic	GSE155907	5	4	Liver
Non-aging	Hepatitis, alcoholic	GSE143318	5	5	Liver
Non-aging	Hepatitis, alcoholic	GSE28619	15	7	Liver
Non-aging	Huntington disease	GSE64810	20	49	CNS (prefrontal cortex)
Non-aging	Huntington disease	GSE79666	7	7	CNS
Non-aging	Huntington disease	GSE152058	14	14	CNS (caudate, putamen)
Non-aging	Huntington disease	GSE129473	78	3	CNS (prefrontal cortex)
Non-aging	Huntington disease	GSE26927	10	10	CNS (caudate nucleus)
Non-aging	Infectious meningitis	GSE111459	15	24	Blood
Non-aging	Infectious meningitis	GSE40586	21	18	Blood
Non-aging	Infectious meningitis	GSE6269	3	6	Blood
Non-aging	Influenza	GSE101702	107	52	Blood
Non-aging	Influenza	GSE34205	28	22	Blood
Non-aging	Influenza	GSE4607	5	15	Blood
Non-aging	Influenza	GSE27131	7	7	Blood
Non-aging	Influenza	GSE40012	39	36	Blood
Non-aging	Multiple sclerosis	GSE26927	10	10	Frontal lobe
Non-aging	Multiple sclerosis	GSE32645	3	3	Cortex
Non-aging	Multiple sclerosis	GSE32915	12	4	White matter
Non-aging	Multiple sclerosis	GSE126802	18	9	White matter
Non-aging	Multiple sclerosis	GSE100297	5	5	Optic chiasm
Non-aging	Multiple sclerosis	GSE83670	4	3	White matter
Non-aging	Multiple sclerosis	GSE123496	5	5	Parietal cortex
Non-aging	Multiple sclerosis	GSE123496	5	5	Frontal cortex
Non-aging	Multiple sclerosis	GSE135511	40	10	Motor cortex
Non-aging	Multiple sclerosis	GSE137619	6	5	Choroid plexus
Non-aging	Multiple sclerosis	GSE138614	71	24	Brain
Non-aging	Pulmonary tuberculosis	GSE42826	11	52	Blood
Non-aging	Pulmonary tuberculosis	GSE83456	45	61	Blood
Non-aging	Pulmonary tuberculosis	GSE42830	16	38	Blood
Non-aging	Pulmonary tuberculosis	GSE42832	10	10	Blood
Non-aging	Pulmonary tuberculosis	GSE42825	8	23	Blood
Non-aging	Pulmonary tuberculosis	GSE107731	3	3	Blood
Non-aging	Pulmonary tuberculosis	GSE34608	8	18	Blood
Non-aging	Schizophrenia	GSE12649	35	34	Prefrontal cortex
Non-aging	Schizophrenia	GSE53987	15	19	Prefrontal cortex
Non-aging	Schizophrenia	GSE53987	15	18	Hippocampus
Non-aging	Schizophrenia	GSE80655	71	70	Brain
Non-aging	Systemic lupus erythematosus	GSE45291	292	20	Blood
Non-aging	Systemic lupus erythematosus	GSE139358	40	11	Blood
Non-aging	Systemic lupus erythematosus	GSE61635	99	30	Blood
Non-aging	Systemic lupus erythematosus	GSE154851	38	32	Blood
Non-aging	Systemic lupus erythematosus	GSE156751	4	4	Blood
Non-aging	Systemic lupus erythematosus	GSE110174	144	10	Blood
Non-aging	Systemic lupus erythematosus	GSE72509	99	18	Blood
Non-aging	Systemic lupus erythematosus	GSE80183	12	4	Blood
Non-aging	Systemic lupus erythematosus	GSE39088	20	46	Blood
Non-aging	Systemic scleroderma	E-MTAB-6531	8	4	Blood
Non-aging	Systemic scleroderma	GSE117928	18	19	Blood
Non-aging	Systemic scleroderma	GSE124073	46	18	Blood
Non-aging	Systemic scleroderma	GSE130953	45	62	Blood
Non-aging	Systemic scleroderma	GSE33463	19	41	Blood
Non-aging	Systemic scleroderma	GSE22356	10	10	Blood
Non-aging	Type 1 diabetes mellitus	GSE10586	12	15	T cells from Blood
Non-aging	Type 1 diabetes mellitus	GSE164338	5	5	CD14+ monocytes from Blood
Non-aging	Type 1 diabetes mellitus	GSE154609	12	12	CD14+ monocytes from Blood
Non-aging	Type 1 diabetes mellitus	GSE123658	33	14	Blood
Non-aging	Type 1 diabetes mellitus	GSE131526	12	3	Blood
Non-aging	Type 1 diabetes mellitus	GSE112341	12	10	Th1 and Treg cells from Blood
Non-aging	Type 1 diabetes mellitus	GSE111876	31	18	CD3+ T cells
Non-aging	Type 1 diabetes mellitus	GSE60424	26	28	Blood
Non-aging	Type 1 diabetes mellitus	GSE55098	12	10	Blood
Non-aging	Type 1 diabetes mellitus	GSE44314	10	6	Blood
Non-aging	Type 1 diabetes mellitus	GSE110914	5	16	Neutrophils
Non-aging	Type 1 diabetes mellitus	GSE9006	43	24	Blood
Non-aging	Ulcerative colitis	GSE65114	12	9	Colon
Non-aging	Ulcerative colitis	GSE10191	8	11	Colon
Non-aging	Ulcerative colitis	GSE59071	97	11	Colonic mucosa
Non-aging	Ulcerative colitis	GSE95437	42	29	Colon
Non-aging	Ulcerative colitis	GSE75214	97	11	Colonic mucosa
Non-aging	Ulcerative colitis	GSE22619	10	10	Colonic mucosa
Non-aging	Ulcerative colitis	GSE10616	10	11	Colon
Non-aging	Ulcerative colitis	GSE87466	87	21	Colon
Non-aging	Ulcerative colitis	GSE9686	5	8	Colon
Non-aging	Ulcerative colitis	GSE126124	18	19	Colon
Non-aging	Ulcerative colitis	GSE13367	17	10	Colonic mucosa
Non-aging	Ulcerative colitis	GSE38713	23	13	Colon
Non-aging	Ulcerative colitis	GSE47908	45	15	Colonic mucosa
Non-aging	Bipolar disorder	GSE12649	33	34	CNS (prefrontal cortex)
Non-aging	Bipolar disorder	GSE53987	18	18	CNS (hippocampus)
Non-aging	Bipolar disorder	GSE80655	71	70	Brain
Non-aging	Bipolar disorder	GSE53987	17	19	CNS (prefrontal cortex)
Non-aging	Psoriasis	GSE13355	58	58	Skin
Non-aging	Psoriasis	GSE54456	92	82	Skin
Non-aging	Psoriasis	GSE30999	85	85	Skin
Non-aging	Psoriasis	GSE34248	14	14	Skin
Non-aging	Psoriasis	GSE41662	24	24	Skin
Non-aging	Psoriasis	GSE121212	28	27	Skin
Non-aging	Psoriasis	GSE78097	27	6	Skin
Non-aging	Psoriasis	GSE78023	14	14	Skin
Non-aging	Psoriasis	GSE6710	13	13	Skin
Non-aging	Psoriasis	GSE106992	67	67	Skin
Non-aging	Psoriasis	GSE14905	33	28	Skin

## Sheet: deleted Table S2
Supplementary Table S2. List of healthy sample datasets analyzed.
Dataset	Technology	Tissue	# Healthy samples	Age (year)	Publish year
GSE117928	Array	Blood	19	30-51	2018
GSE123658	RNA-seq	Blood	14	24-59	2018
GSE134080	RNA-seq	Blood	99	18-73	2019
GSE154851	Array	Blood	32	19-54	2020
GSE16028	Array	Blood	22	23-64	2009
GSE19314	Array	Blood	20	34-70	2009
GSE19743	Array	Blood	63	7-63	2010
GSE42057	Array	Blood	42	45.8-79.6	2012
GSE60244	Array	Blood	40	25-92	2014
GSE61672	Array	Blood	166	20-82	2014
GSE67784	Array	Blood	75	19-83	2015
GSE73754	Array	Blood	20	20-71	2015
GSE83456	Array	Blood	61	20-68	2016
GSE83632	Array	Blood	87	19-63	2016
GSE98793	Array	Blood	64	31.2-73.1	2017
GSE101521	RNA-seq	Brain	29	16-80	2017
GSE125583	RNA-seq	Brain	70	71-103	2019
GSE138082	RNA-seq	Brain	39	46-72	2020
GSE28894	Array	Brain	59	57-95	2011
GSE35974	Array	Brain	50	30-70	2012
GSE35977	Array	Brain	50	30-70	2012
GSE62191	Array	Brain	30	19-60	2014
GSE64810	RNA-seq	Brain	98	2-106	2015
GSE80655	RNA-seq	Brain	70	32-70	2017
GSE95587	RNA-seq	Brain	33	73-99	2017
GSE134900	RNA-seq	Colon	44	6-59	2019
GSE38713	Array	Colon	13	20-60	2012
GSE71187	Array	Colon	12	22-68	2015
GSE10586	Array	Immune cell	15	9.9-58.0	2008
GSE154609	Array	Immune cell	12	23-54	2020
GSE47756	Array	Immune cell	36	41-79	2013
GSE103174	Array	Lung	16	48-78	2017
GSE31210	Array	Lung	15	30-68	2011
GSE8581	Array	Lung	18	40-84	2007
GSE109484	RNA-seq	Respiratory tract	14	21-56	2018
GSE119136	Array	Respiratory tract	31	18-76	2018
GSE41861	Array	Respiratory tract	30	21-66	2012
GSE41862	Array	Respiratory tract	21	26-76	2012
GSE43696	Array	Respiratory tract	20	18.2-58.4	2013
GSE64913	Array	Respiratory tract	20	19-54	2015
GSE6710	Array	Skin	13	32-76	2007
GSE68801	Array	Skin	36	23-61	2015
GSE85861	RNA-seq	Skin	91	19-89	2016
